# Supplementary material
Source: PubMed Central journal article supplement (PMC5373457)
Supplement: ASN.2016050567SupplementaryData1.pdf [file ASN.2016050567SupplementaryData1.pdf]

# Supplemental Materials

## **include**

Supplemental Methods and References

Supplemental Figures and Legends

Supplemental Video Legends

Supplemental Tables

## **Supplemental Methods**

### ***Transfection and selection for stable clones of HEK293 Tet-on G0, G1, G2, and empty vector***

cDNAs of *APOLI* G0, G1, and G2 were inserted into the *NheI*- and *SalI*-digested pTRE2hyg vector (Clontech, Mountain View, CA).<sup>1</sup> To obtain Tet-inducible cell lines stably expressing *APOLI*, HEK 293 Tet-On 3G cell lines (Clontech, Mountain View, CA) were transfected in 100 mm dishes at 30% confluence with 5 µg pTRE2hyg plasmid containing *APOLI* G0, G1, G2, and empty vector using Lipofectamine transfection reagent (Invitrogen, Waltham, MA) based on manufacturer instructions. Cells were selected with DMEM (Invitrogen) containing 10% FBS supplemented with 400 µg/ml G418 (Cellgro, Manassas, VA) and 100 µg/ml hygromycin B (Invitrogen, Waltham, MA) 24 h post-transfection. Selection medium was replaced every 48h for 20 days. Individual clones were isolated, expanded, and maintained in DMEM media with 10% FBS, 100 µg/ml G418 and 50 µg/ml hygromycin B (referred to as complete DMEM growth media). Eight clones were characterized for each variant; one clone per variant was selected for all experiments. Individual clones with G0, G1 and G2 *APOLI* genotypes and empty pTRE2hyg vector were analyzed for inducible *APOLI* expression by RT-PCR, immunoblot analysis, and immunofluorescence.

### ***Total RNA isolation, quality control, and real-time PCR***

Total RNA was isolated from HEK293 Tet-on cells using RNAeasy Mini Kit (Qiagen, Germany). The quantity and quality of isolated RNA were determined by ultraviolet spectrophotometry and electrophoresis, respectively, on the Nanodrop 2000 (Thermo Fisher Scientific, Wilmington, DE) and Agilent 2100 Bioanalyzer (Agilent Technologies, Santa Clara, CA).

To determine *APOLI* mRNA levels in cells, 200ng of RNA was reverse transcribed with random hexamer primers using the TaqMan RT kit (Applied Biosystems, Foster City, CA). Primers were designed to capture all known *APOLI* splice variants. RT-PCR in the presence of SYBRGreen was performed with a Roche 480 Real-Time PCR system (Roche Diagnostics, Germany) using 18S ribosomal RNA for normalization. Primer sequences were described previously.<sup>2</sup> The  $\Delta\Delta$ CT method<sup>3</sup> was used to

quantify the relative levels of *APOL1* mRNA. Fold-changes were normalized to mRNA levels on HEK293 Tet-on G0 cells without Dox induction. All experiments were performed in triplicate and results expressed as mean  $\pm$  SD if not specified.

After Dox dose titration experiments to induce comparable levels of *APOL1* expression with each genotype, HEK293 Tet-on 3G cell lines stably expressing G0, G1, and G2 were incubated with 0.0313, 0.0625, and 0.1250  $\mu$ g/ml Dox (BD Biosciences, San Jose, CA), respectively, for 8h or 16h. *APOL1* G0, G1, and G2 mRNA and protein expression was induced to similar levels in HEK293 Tet-on cell lines because inconsistent levels would complicate comparisons of downstream pathways. Dox-induced *APOL1* G0 expression levels in HEK293 Tet-on cells were introduced to a high enough level to distinguish that from non-induced cells while the cell viability remained the same for cells with and without induction. This allowed post-induction gene expression patterns for G1 and G2 vs. G0 to be more readily detectable. The cell line stably transfected with empty pTRE2hyg plasmid was incubated with 0.25  $\mu$ g/ml Dox to ensure absence of *APOL1* expression and serve as a control for gene expression studies. Inclusion of HEK293 empty pTRE2hyg vector Tet-on cells excluded significant transcript level changes related to Dox induction (data not shown), and ensured that altered gene expression in HEK293 Tet-on cells with and without Dox induction were attributed to over-expression of *APOL1* variants.

### ***Cell viability assay***

Stabilized HEK293 Tet-on *APOL1* G0, G1, G2 and empty vector cells (20,000/well) were seeded on three 96-well plates. After 24h of growth, cells were induced with Dox for 2hr, 4hr, 8hr or 16hr in complete DMEM media; non-induced cells were incubated with corresponding DMEM media without Dox. Cell viability was measured using Cytotox 96 LDH viability assay kit (Promega, Madison, WI) per manufacturer instructions. Each cell line (with and without Dox induction) was measured at least 6 times, with values expressed as mean  $\pm$  SD on the bar graph. Full cell viability was defined as 1.0 (100% viable).

### ***Global gene expression and pathway analyses***

Total RNAs were isolated from HEK293 Tet-on cell lines stably expressing *APOLI* G0, G1, and G2 (and empty vector) cell lines with and without Dox induction. All 24 RNA samples (eight groups in triplicate, see [Supplemental Figure 1](#)) were processed on Illumina human HT-12 v4 arrays in a single batch according to manufacturer instructions. Six RNA samples (G0, G1 and G2, in duplicate) were examined on exon-based Affymetrix HTA2.0 arrays to confirm the findings from Illumina bead arrays. In addition, 53 samples of non-diseased primary proximal tubule cells (PTCs) from African Americans were processed on Affymetrix HTA2.0 arrays to determine whether the most differentially expressed genes attributed to *APOLI* renal-risk variants replicated findings in the HEK293 Tet-on cell model. Since Illumina and Affymetrix arrays were done in the same batch, no batch effects were seen. The quality control analysis and normalization confirmed the absence of failed samples or outliers. Whole genome transcript intensity profiles were extracted using GenomeStudio V2011.1 for Illumina human HT-12 v4 arrays and Transcriptome Analysis Console (TAC) software for Affymetrix HTA 2.0 arrays, respectively. Levels of expression were estimated by RMA<sup>4</sup> normalized log<sub>2</sub> converted probe set pixel intensity. The threshold for detectable transcripts was set at signal/noise ratio (SNR) greater than 3. The gene expression data of Illumina HT-12 v4 and Affymetrix HTA 2.0 arrays are available in the NCBI Gene Expression Omnibus (GEO) database.

Paired analysis between HEK293 Tet-on *APOLI* cell samples for differentially expressed genes were performed by empirical Bayes method<sup>5</sup> implemented in R Bioconductor limma package, where the selection thresholds used were  $|\log_{2}FC| > 1$  and FDR (False Discovery rate)  $p < 0.01$ .

EPIG<sup>6</sup>, a java-based gene expression profile clustering method was employed. It uses an unsupervised profile approach to extract patterns from whole data sets and then categorize the genes to one of the patterns if they met all of the following criteria: SNR  $> 3$ , corresponding  $p < 0.005$ , absolute log<sub>2</sub> fold change  $> 1$ , and maximum Pearson correlation  $r$  value to a given pattern  $> 0.87$ . This approach was applied to both Illumina and Affymetrix array data for RNA samples of Dox-induced G0, G1 and G2 cells. The former arrays were performed in triplicate and the later in duplicate; 14 and 11 patterns were extracted, respectively. Each pattern consisted of a set of genes which were highly similar in their

expression profiles, which may be co-expressed and relevant to biological co-regulation. Overall, fewer than 8% of expressed genes were selected from either array to form specific patterns, representing the high stringency of criterion settings for EPIG.

Both Cytoscape (<http://www.cytoscape.org/>) and Ingenuity pathway analysis (IPA) (<http://www.ingenuity.com/>) were performed to identify significant pathways relevant to G1 and G2.

Paired analysis between PTCs with 2 renal-risk alleles and those without risk alleles for differentially expressed genes were performed using the Affymetrix TAC package, where the selection thresholds employed were  $|\logFC| > 1.5$  and ANOVA  $p < 0.005$ .

### ***Immunoblotting***

Immunoblotting was performed as reported.<sup>2</sup> Briefly, blots were incubated overnight at 4°C with primary antibodies. The membranes were then washed three times in Tris-buffered saline containing 0.1% Tween 20 and incubated for 1h in blocking buffer with an anti-rabbit or mouse IgG secondary antibody conjugated to horseradish peroxidase (1:20,000; Jackson ImmunoResearch Laboratories, West Grove, PA). Detailed information on experimental conditions for primary antibodies used in immunoblot is provided in **Supplemental Table 12**. COX IV and VDAC1 served as mitochondrial content markers.<sup>8,9</sup>

### ***Immunofluorescence***

Immunofluorescence of APOL1 (Epitomics, Burlingame, CA) and mitochondrial marker ATP5A1 (Invitrogen, Frederick, MD) and other markers was performed on HEK293 Tet-on cell lines using established protocols.<sup>2</sup> Secondary antibodies (goat anti-rabbit Alexa Fluor 594 and goat anti-rabbit Alexa Fluor 488, Invitrogen) were used to display fluorescent signals (1:500 dilution). Microscopy was performed using a Zeiss LMS 710 confocal microscope (Oberkochen, Germany).

Fifty nM of mitotracker Green (Invitrogen) and 10 nM of TMRE (Invitrogen) were incubated with HEK293 Tet-on cells for 30 min prior to signal detection. Microscopy was performed using an

Olympus IX71 fluorescence microscope (Olympus Scientific Solutions Americas Corp., Waltham, Massachusetts).

### *Measurement of intracellular potassium concentrations*

HEK293 Tet-on *APOL1* (G0, G1 and G2) cells were seeded on a 96 well plate pre-coated with Cell-Tak (Corning, Bedford, MA) at a density of 20,000 cells/well 24 hr prior to Dox induction. After 8 hr or 16 hr of Dox induction, Dox-induced and non-induced cells were incubated with a fluorescent potassium indicator (Asante Potassium Green-2 AM, APG-2 AM, Abcam, Cambridge, MA) for 30 min in 3% BSA-PBS (final concentration 2  $\mu$ M) according to the manufacturer's instructions, followed by a 5 min gentle wash with PBS. The indicator was excited at 488 nm and fluorescent emission intensity was measured at 530 nm. Fluorescence signals were read on a BioTek Synergy-HTX multi-mode plate reader (BioTek, Winooski, VT). A standard curve was constructed based on measurements of fluorescent intensity in HEK293 G0 cells incubated with a 50  $\mu$ M of amphotericin B, an ionophore, for 15 min for each  $[K^+]$  standard concentration. Ionophore treatment allowed  $[K^+]$  equilibration with known standard extracellular 50, 100 and 150 mM  $[K^+]$  in 3% BSA-PBS. The standards were made in cell culture buffer in which NaCl ions were iso-osmotically replaced by KCl, keeping the osmolarity 300 mOsm/L. A standard curve was obtained from a series of triplicate wells of known ionophore-balanced intracellular  $[K^+]$  on the same plate as G0, G1 and G2 cell samples, by plotting  $[K^+]$  vs. fluorescent intensity and determining the line of best fit using linear regression ( $r^2=0.99$ ). The fluorescent signals were normalized to cell lysate total protein in corresponding wells before being used for quantification of intracellular  $[K^+]$ . The measurement in each cell type (G0, G1 and G2; without and with Dox induction) was repeated in four wells, and the average of the four measurements is shown on the bar graph. P-values were assessed using ANOVA.

### Supplemental References:

1. Cheng D, Weckerle A, Yu Y, Ma L, Zhu X, Murea M, Freedman BI, Parks JS, Shelness GS: Biogenesis and cytotoxicity of APOL1 renal risk variant proteins in hepatocytes and hepatoma cells. *J. Lipid Res.* 56: 1583–1593, 2015
2. Ma L, Shelness GS, Snipes JA, Murea M, Antinozzi PA, Cheng D, Saleem MA, Satchell SC, Banas B, Mathieson PW, Kretzler M, Hemal AK, Rudel LL, Petrovic S, Weckerle A, Pollak MR, Ross MD, Parks JS, Freedman BI: Localization of APOL1 protein and mRNA in the human kidney: nondiseased tissue, primary cells, and immortalized cell lines. *J. Am. Soc. Nephrol.* 26: 339–348, 2015
3. Livak KJ, Schmittgen TD: Analysis of relative gene expression data using real-time quantitative PCR and the 2(-Delta Delta C(T)) Method. *Methods* 25: 402–408, 2001
4. Bolstad BM, Irizarry RA, Astrand M, Speed TP: A comparison of normalization methods for high density oligonucleotide array data based on variance and bias. *Bioinforma.* 19: 185–193, 2003
5. Smyth GK: Linear models and empirical bayes methods for assessing differential expression in microarray experiments. *Stat. Appl. Genet. Mol. Biol.* 3: 3, 2004
6. Chou JW, Zhou T, Kaufmann WK, Paules RS, Bushel PR: Extracting gene expression patterns and identifying co-expressed genes from microarray data reveals biologically responsive processes. *BMC Bioinforma.* 8: 427, 2007
7. Maere S, Heymans K, Kuiper M: BiNGO: a Cytoscape plugin to assess overrepresentation of gene ontology categories in biological networks. *Bioinforma.* 21: 3448–3449, 2005
8. De Pablo-Latorre R, Saide A, Polishhuck EV, Nusco E, Fraldi A, Ballabio A: Impaired parkin-mediated mitochondrial targeting to autophagosomes differentially contributes to tissue pathology in lysosomal storage diseases. *Hum. Mol. Genet.* 21: 1770–1781, 2012
9. Converso DP, Taillé C, Carreras MC, Jaitovich A, Poderoso JJ, Boczkowski J: HO-1 is located in liver mitochondria and modulates mitochondrial heme content and metabolism. *FASEB J.* 20: 1236–1238, 2006

# **Supplemental Figures**



# HEK293 Tet-on APOL1 cell lines

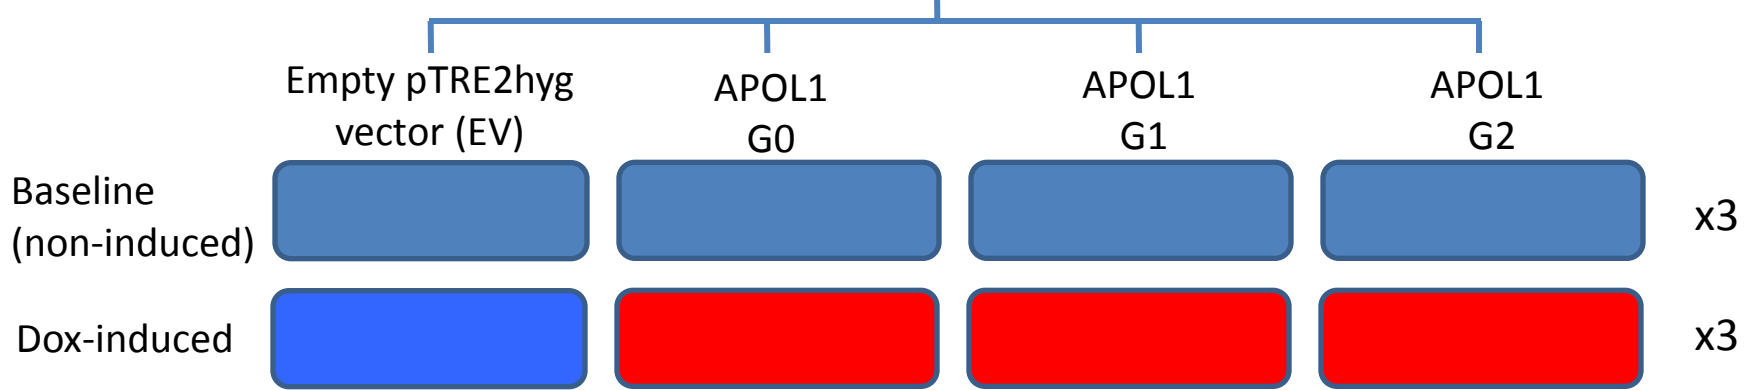

Global gene expression pattern change with and without Dox induction

- a) Global gene expression profile change in HEK293 Tet-on APOL1 G0, G1 and G2 with and without Dox induction;
- b) Global gene expression profile and pattern changes in HEK293 Tet-on APOL1 G0, G1, and G2 cells after Dox induction

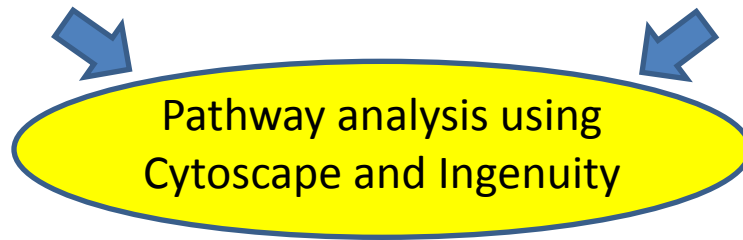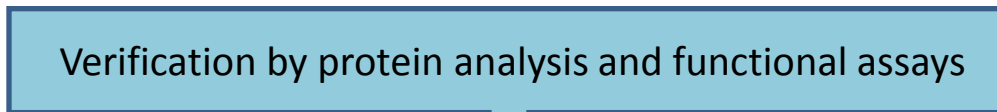

Detection of pathways most significantly impacted

Supplemental Figure 1

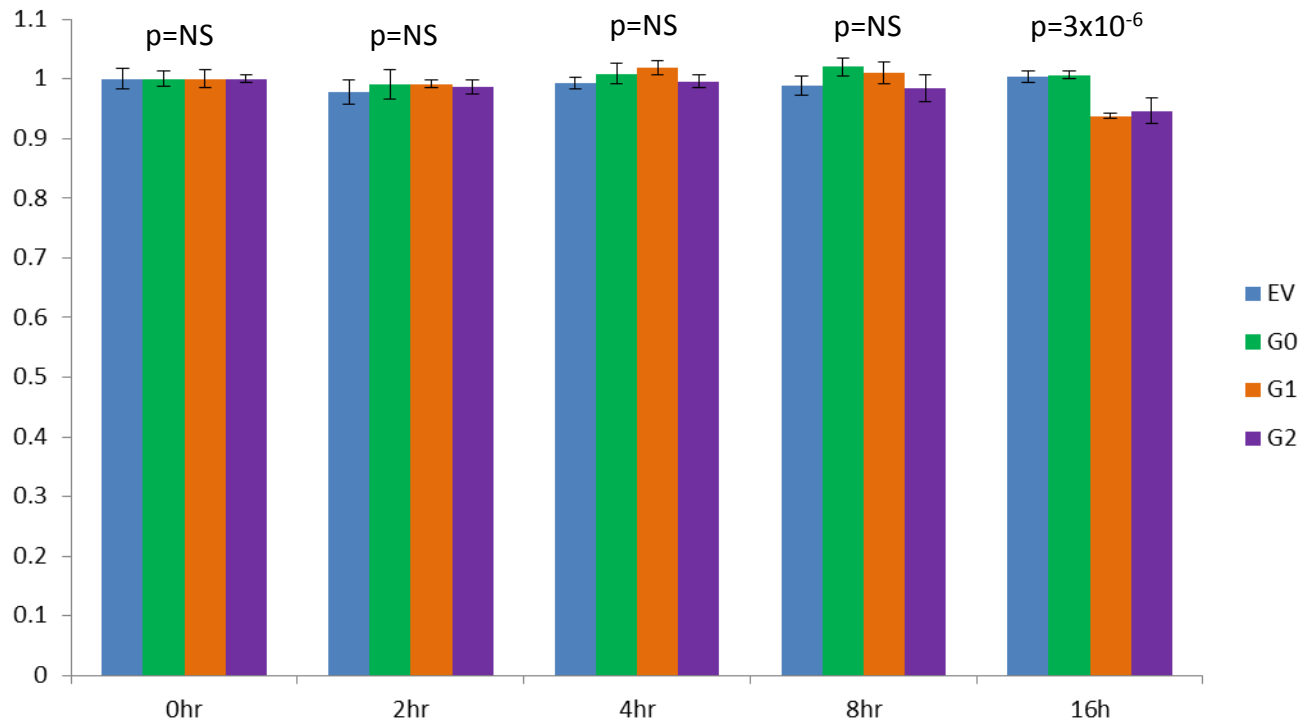

Supplemental  
Figure 2

**Supplemental Figure 2. Quantitation of serial cell viability of HEK293 Tet-on G0, G1, or G2 cells with Dox induction at time point 0, 2, 4, 8 and 16 hr.**

Stabilized HEK293 Tet-on *APOL1* G0, G1, G2 and empty vector (EV) cells were seeded on three 96-well plates at a density of 20,000/well. After 24h of growth, cells were induced with Dox for 2hr, 4hr, 8hr and 16hr, respectively, in complete DMEM media. Non-induced cells were incubated with corresponding DMEM media without Dox. Cell viability was measured using the Cytotox 96 LDH viability assay kit (Promega, Madison, WI) per manufacturer instructions. Each cell line (with and without Dox induction) was measured at least 6 times, with values expressed as mean  $\pm$  SD on the bar graph. Full cell viability was defined as 1 (100%). NS: not significant ( $p>0.05$ ).

Unfolded protein response

Extracellular space

Cytoplasm

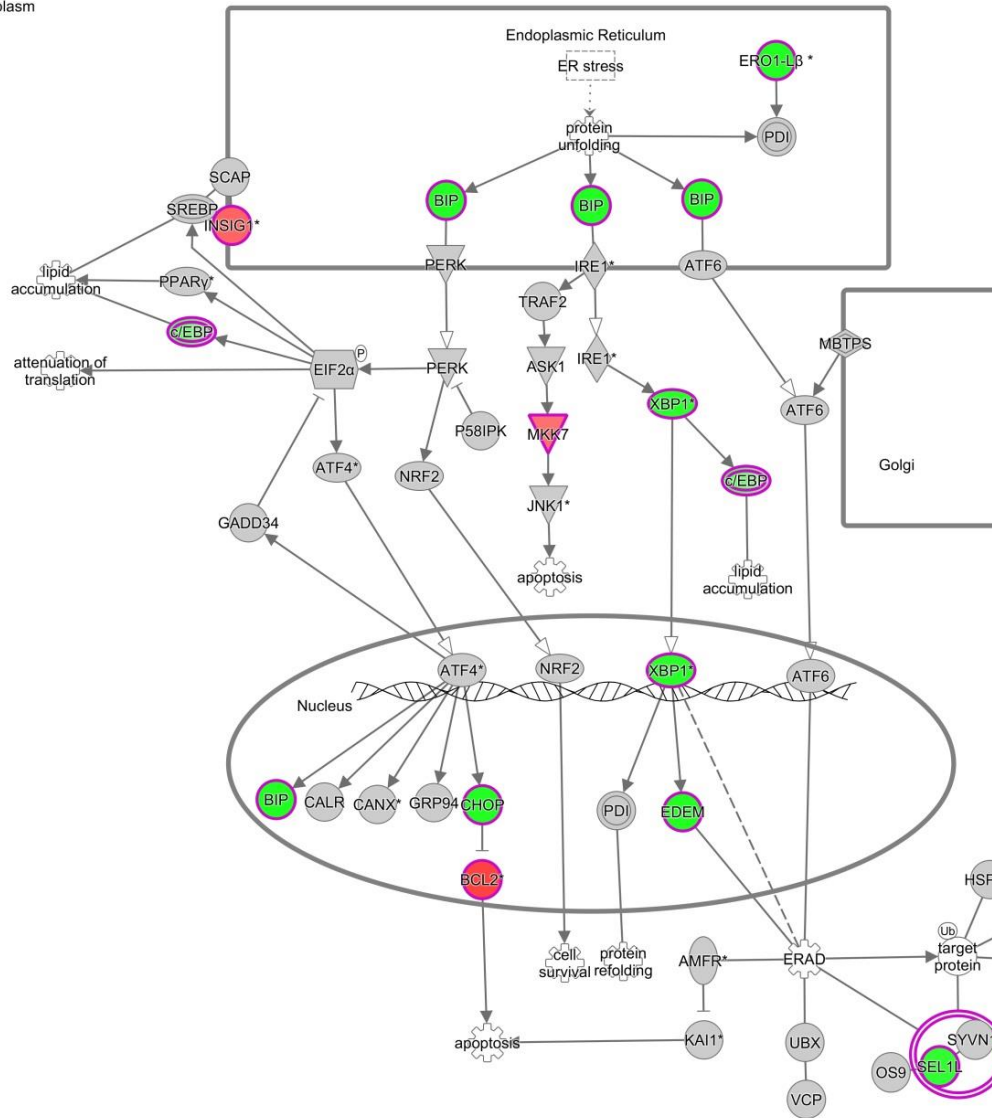

Supplemental  
Figure 3

**Supplemental Figure 3. *APOL1* G0 inhibits the unfolded protein response (endoplasmic reticulum stress)**

Down-regulation of the endoplasmic reticulum (ER) stress pathway by Dox-induced *APOL1* G0 over-expression is characterized by decreased ER stress sensor BiP, effector CHOP and chaperone HSP70/co-chaperone HSP40.

Pathway symbols are defined in Figure 3 legend.

A

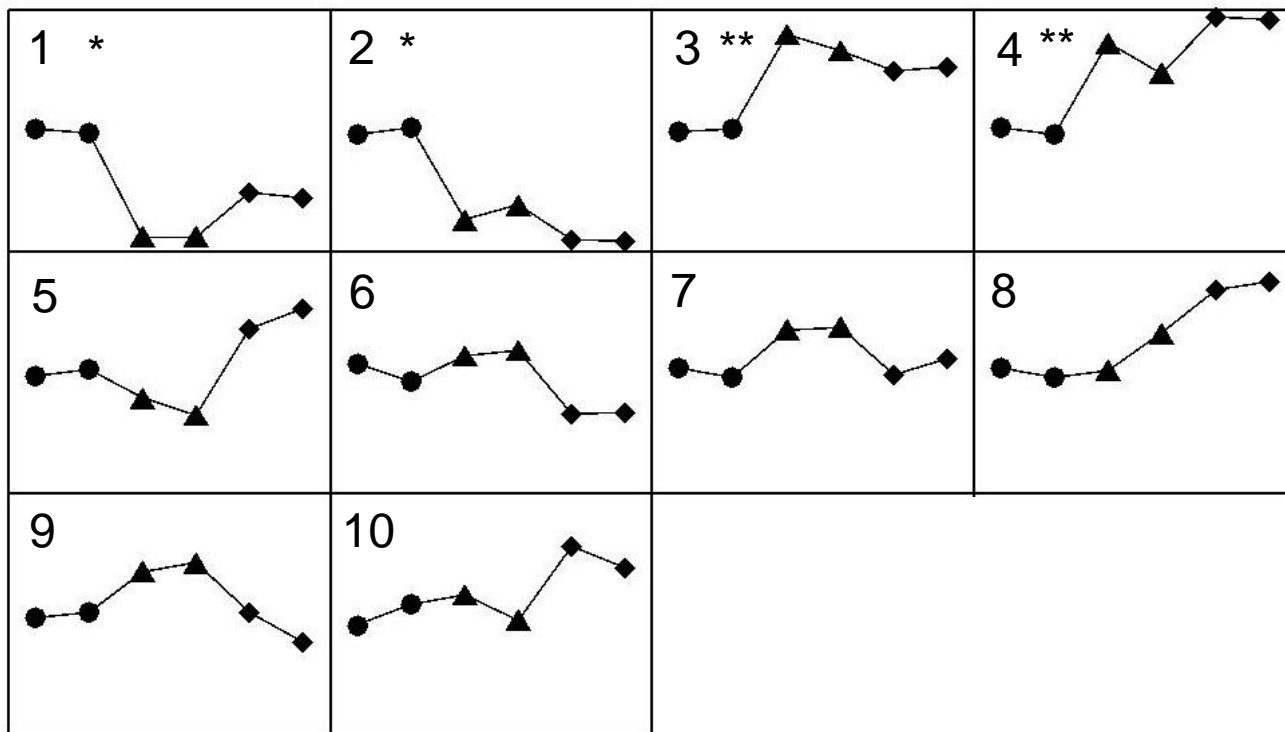

B

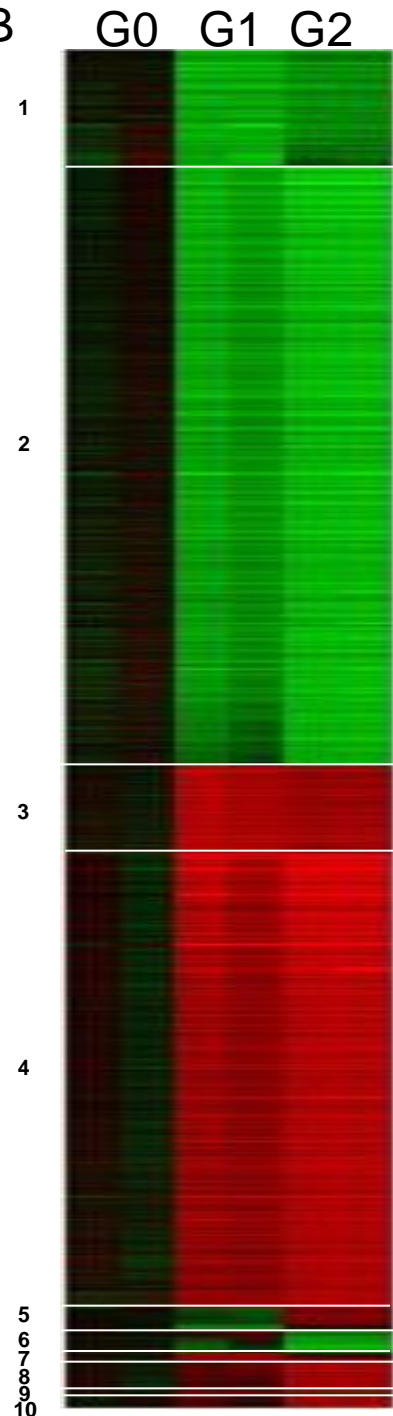

**Supplemental Figure 4. Significantly clustered expression patterns for HEK293 Tet-on *APOL1* G0, G1, and G2 cells in pattern analysis on Affymetrix HT 2.0 arrays**

A) Gene expression patterns most altered in HEK293 Tet-on *APOL1* G0 (circle), G1 (triangle), and G2 (diamond) cells with Dox induction.

\*Mitochondrial dysfunction is enriched in patterns 1 and 2; \*\*Activated TGF- $\beta$  signaling is enriched in patterns 3 and 4.

B) Heat map of clustered gene expression patterns from top to bottom includes 3620 transcripts, order from pattern 1 to 10. Transcript expression in G0 cells shown in black; red and green correspond to up or down regulated transcripts, respectively, in G1 or G2 cells. Lighter colors denote less differential expression.

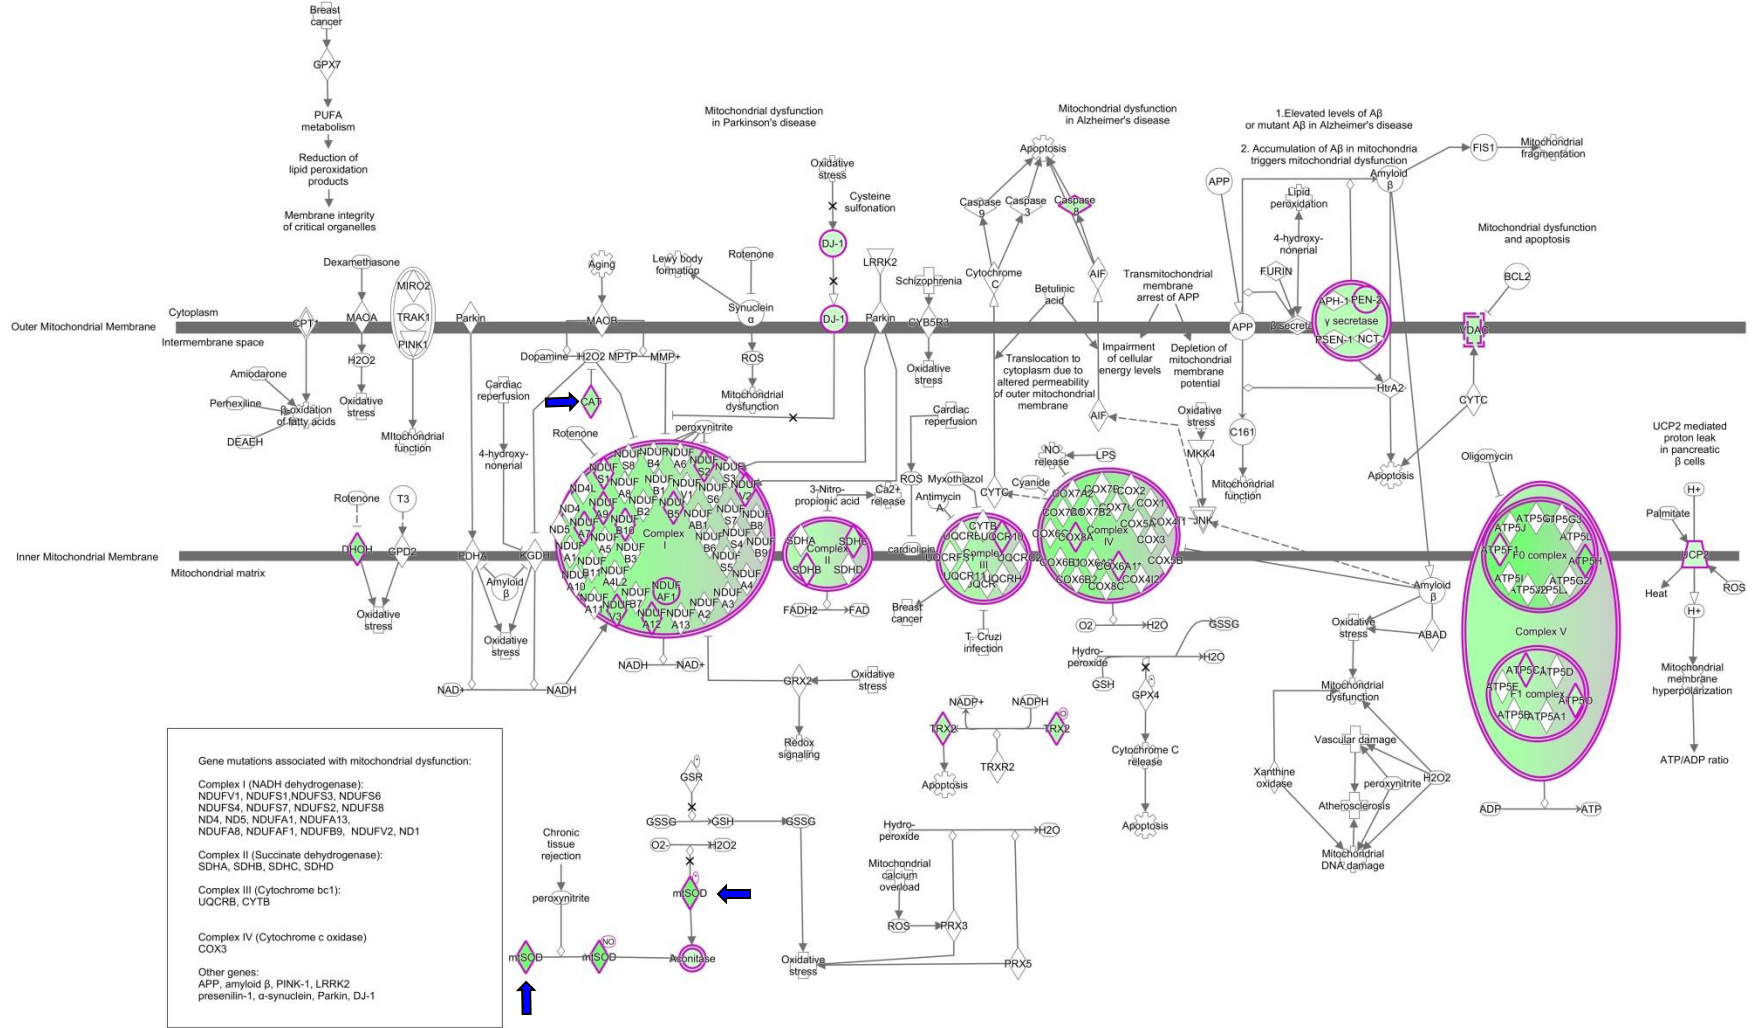

Supplemental Figure 5



## **Supplemental Figure 5. *APOL1* G1 and G2 renal-risk variants contribute to mitochondrial dysfunction**

Affymetrix array patterns 1 and 2 (Supplemental Figure 4) were analyzed using IPA for HEK293 Tet-on *APOL1* G1 and G2 vs. G0 cells. Results indicate marked down-regulation of enzymes in mitochondrial complexes I to V. In addition, mtSOD/*SOD2* and *CAT* (blue arrows) were down-regulated by *APOL1* renal-risk variants, suggesting a role for oxidative stress in *APOL1*-associated nephropathy.

Pathway symbols are defined in Figure 3 legend.

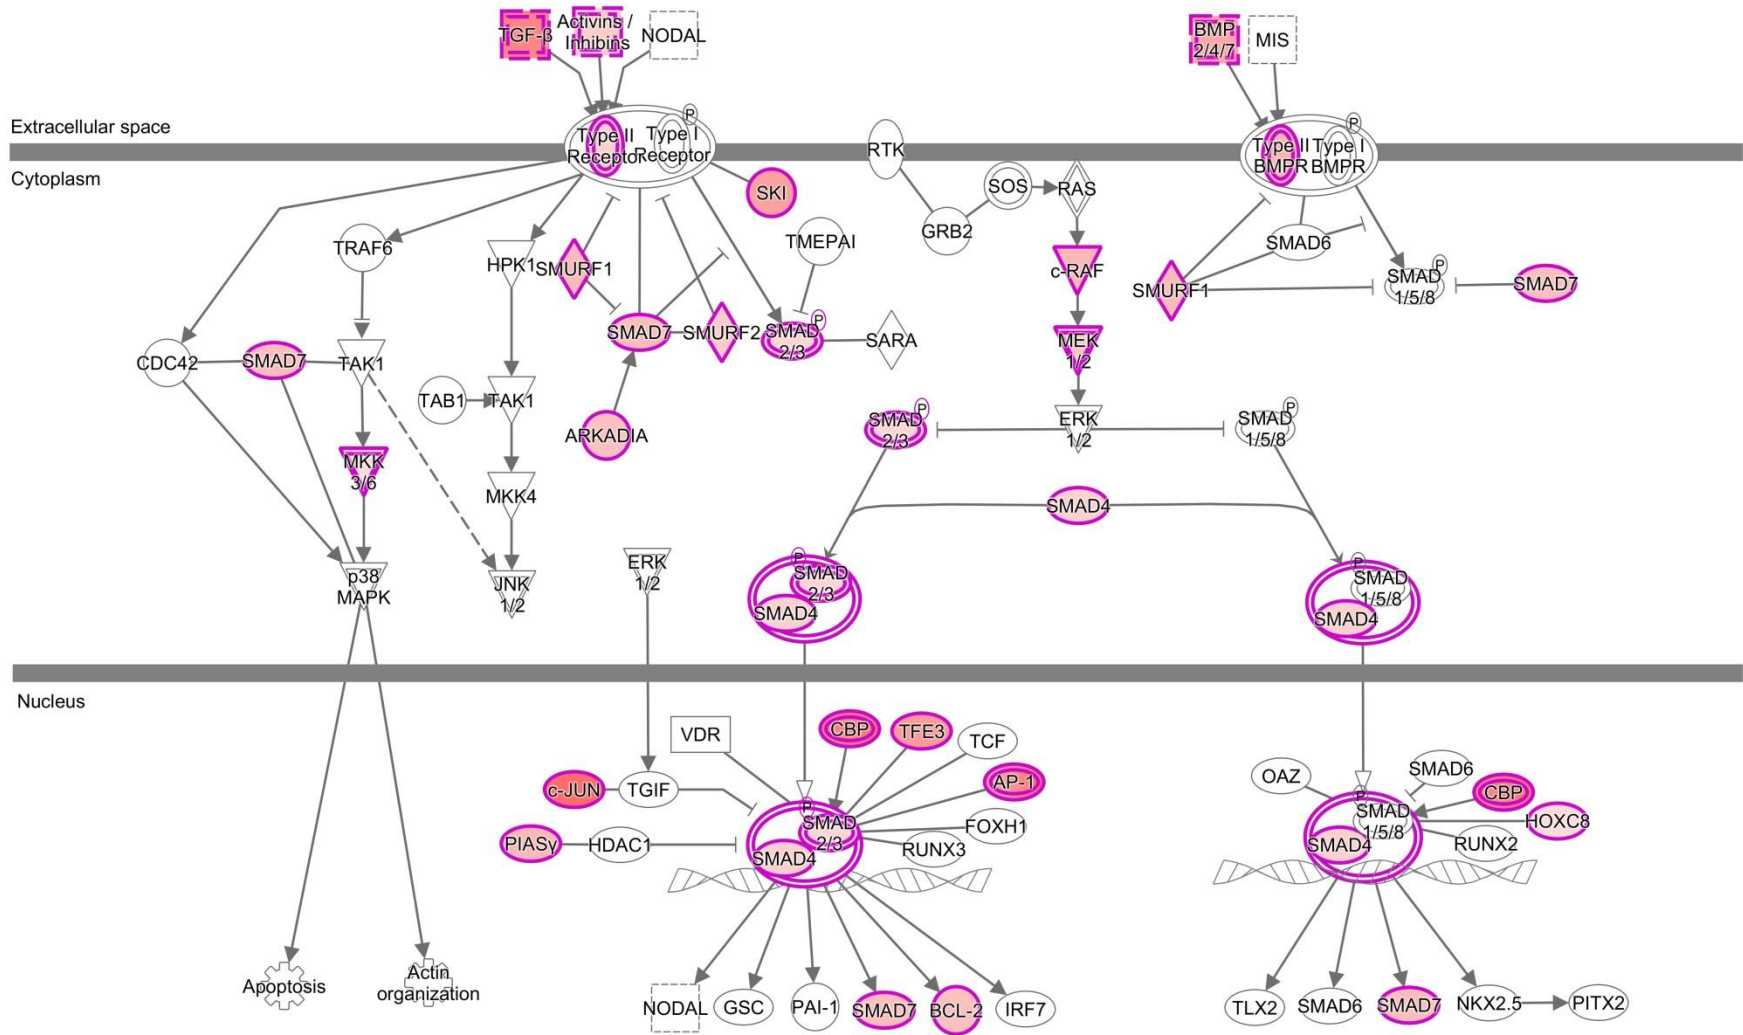

Supplemental  
Figure 6

**Supplemental Figure 6. *APOL1* G1 and G2 renal-risk variants contribute to activated TGF- $\beta$  signaling.**

AFFY patterns 3 and 4 were analyzed using IPA for HEK293 Tet-on *APOL1* G1 and G2 vs. G0 cells. Results indicate up-regulation of transcripts in the canonical TGF- $\beta$  signaling pathway.

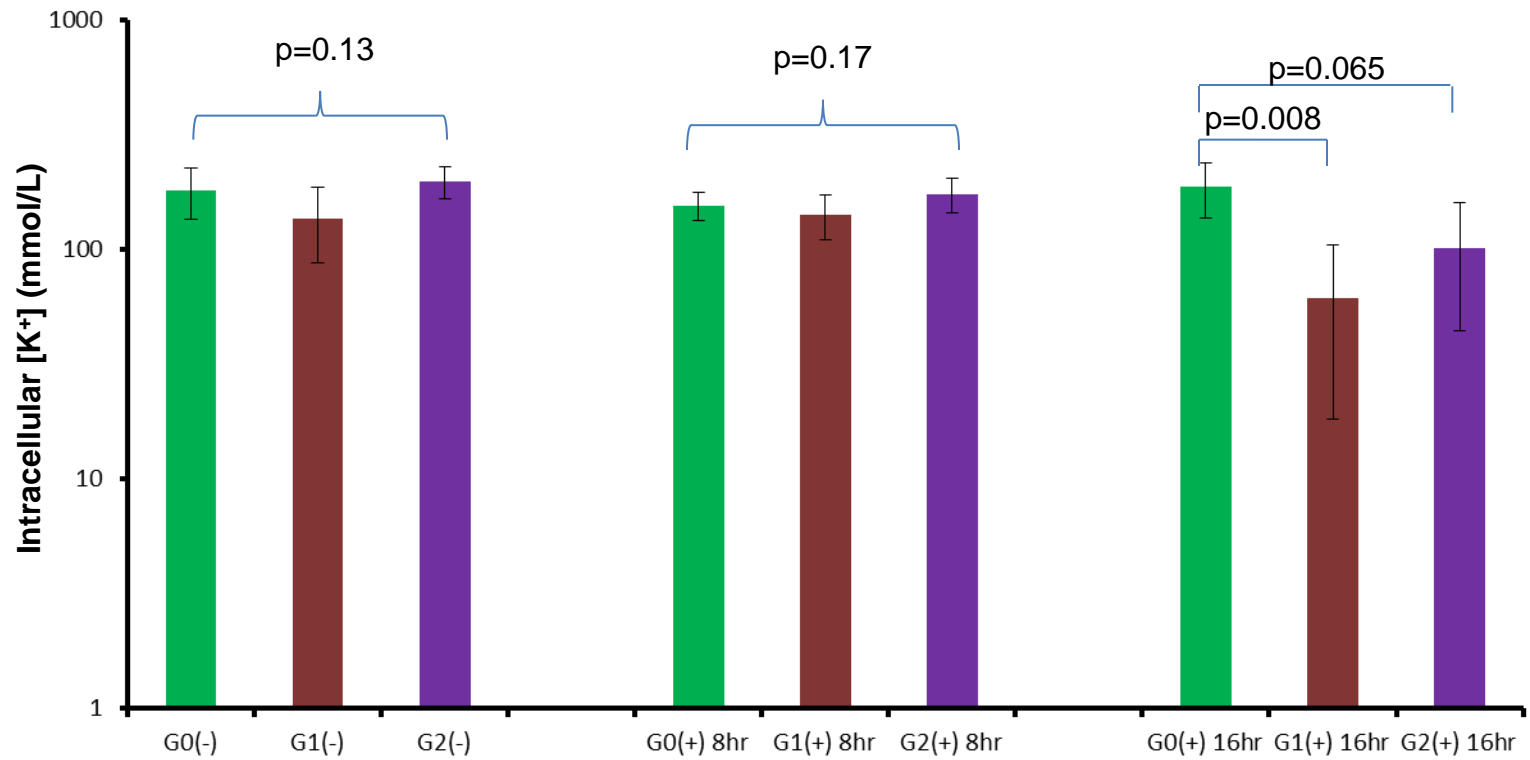

Supplemental  
Figure 7

## **Supplemental Figure 7. Intracellular potassium concentrations for HEK293 Tet-on G0, G1, or G2 cells without Dox and with Dox induction for 8 and 16 hr.**

Intracellular  $[K^+]$  was measured in quadruplicate with fluorescent potassium indicator (Asante Potassium Green-2 AM) for HEK293 Tet-on G0, G1 and G2 cells without and with Dox induction (8 hr and 16 hr). The intracellular potassium concentration  $[K^+]$  (in mmol/L) is  $\log_{10}$  transformed on the y-axis.

No significant difference in  $[K^+]$  was observed among 16hr-Dox-induced G0 cells and non-induced or 8-hr-Dox-induced G0, G1 and G2 cells (ANOVA  $p=0.10$ ), the estimated average intracellular  $[K^+]$  of which was  $168.0 \pm 40.1$  mmol/L (total  $n=28$  in 7 groups). The estimated intracellular  $[K^+]$  for G1 and G2 cells with 16 hr Dox induction was reduced to  $61.2 \pm 43.2$  mmol/L ( $n=4$ ) and  $101.8 \pm 49.8$  mmol/L ( $n=4$ ), respectively.

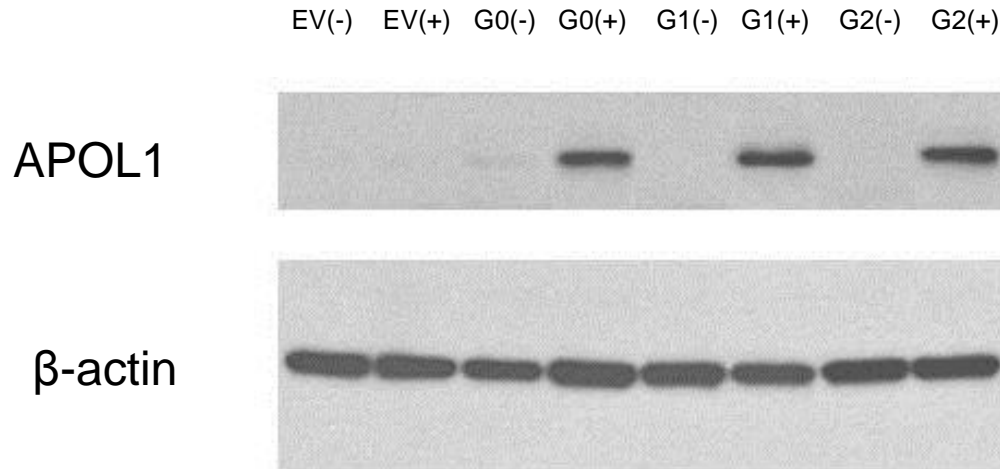

**Supplemental Figure 8. Relative APOL1 expression level is comparable in HEK293 Tet-on cells with Dox induction for 8 hr.** HEK293 Tet-on cells with (+) or without (-) Dox induction were grown in complete DMEM growth media for 8 hr. Four ug of total cell lysate protein was loaded onto a 4-20% SDS-PAGE gel and probed with APOL1 antibody. HEK293 Tet-on empty pTRE2hyg vector cells did not express APOL1 with or without Dox induction. HEK293 Tet-on APOL1 G0, G1, and G2 cells expressed similar amounts of APOL1 (elevated) with Dox induction, while trace or negligible amounts of APOL1 were present in HEK293 Tet-on cells without Dox induction. The data are representative of three trials of immunoblot with similar results.

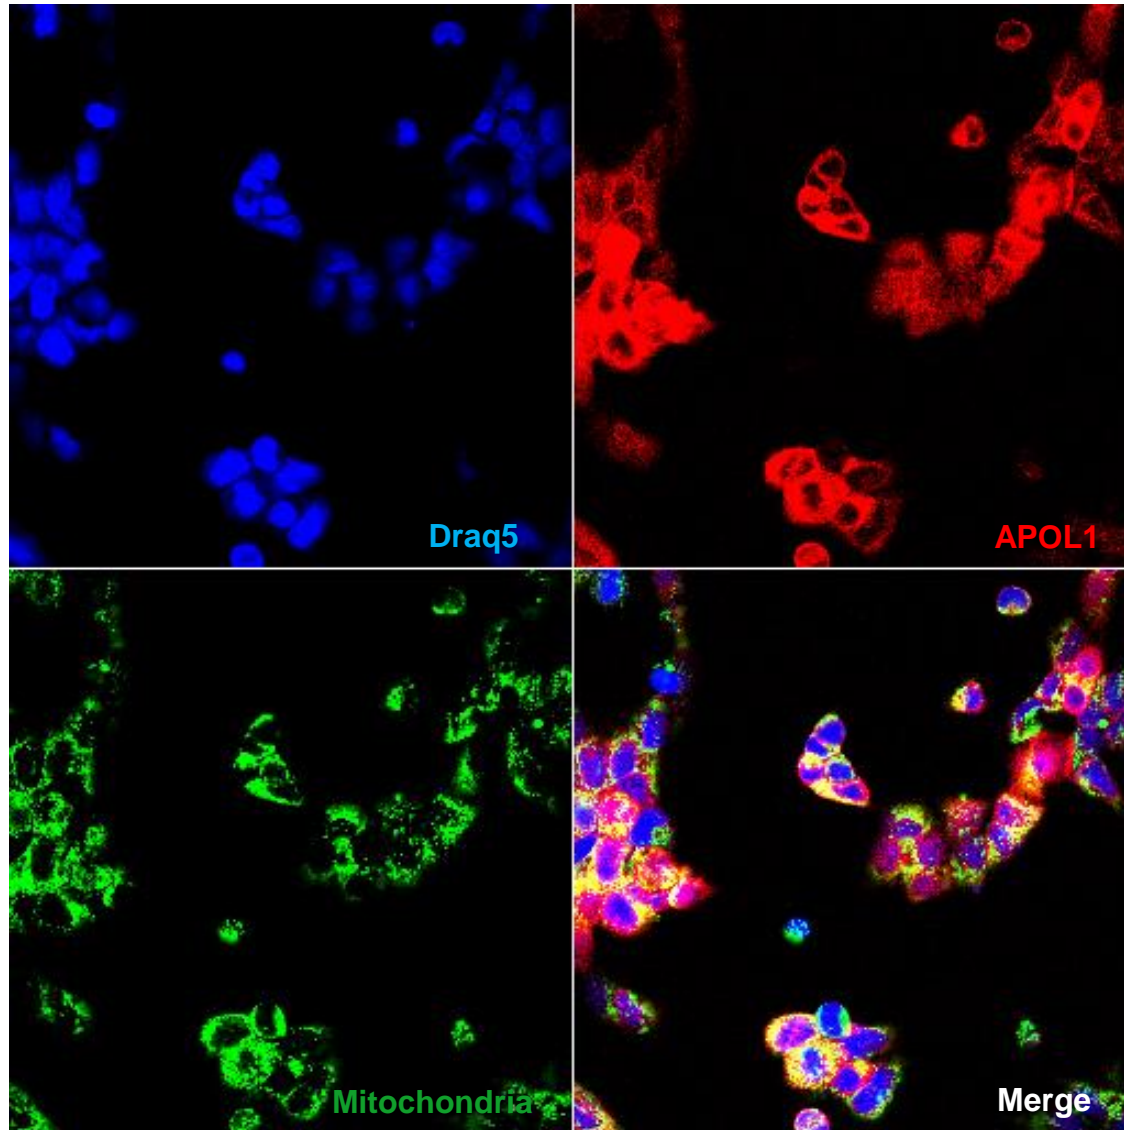

**Supplemental  
Figure 9A**

**Supplemental Figure 9. APOL1 co-localizes with mitochondria.**

A) Confocal immunofluorescence microscopy (630x) on HEK293 Tet-on G0 cells with Dox induction as representative of APOL1 colocalization with mitochondria. After fixation with 4% paraformaldehyde and washing with PBS, cells were stained for APOL1 (red), ATP synthase 5A1 (ATP5A1; green), a mitochondria marker, and Draq5 (blue), a nuclear stain.



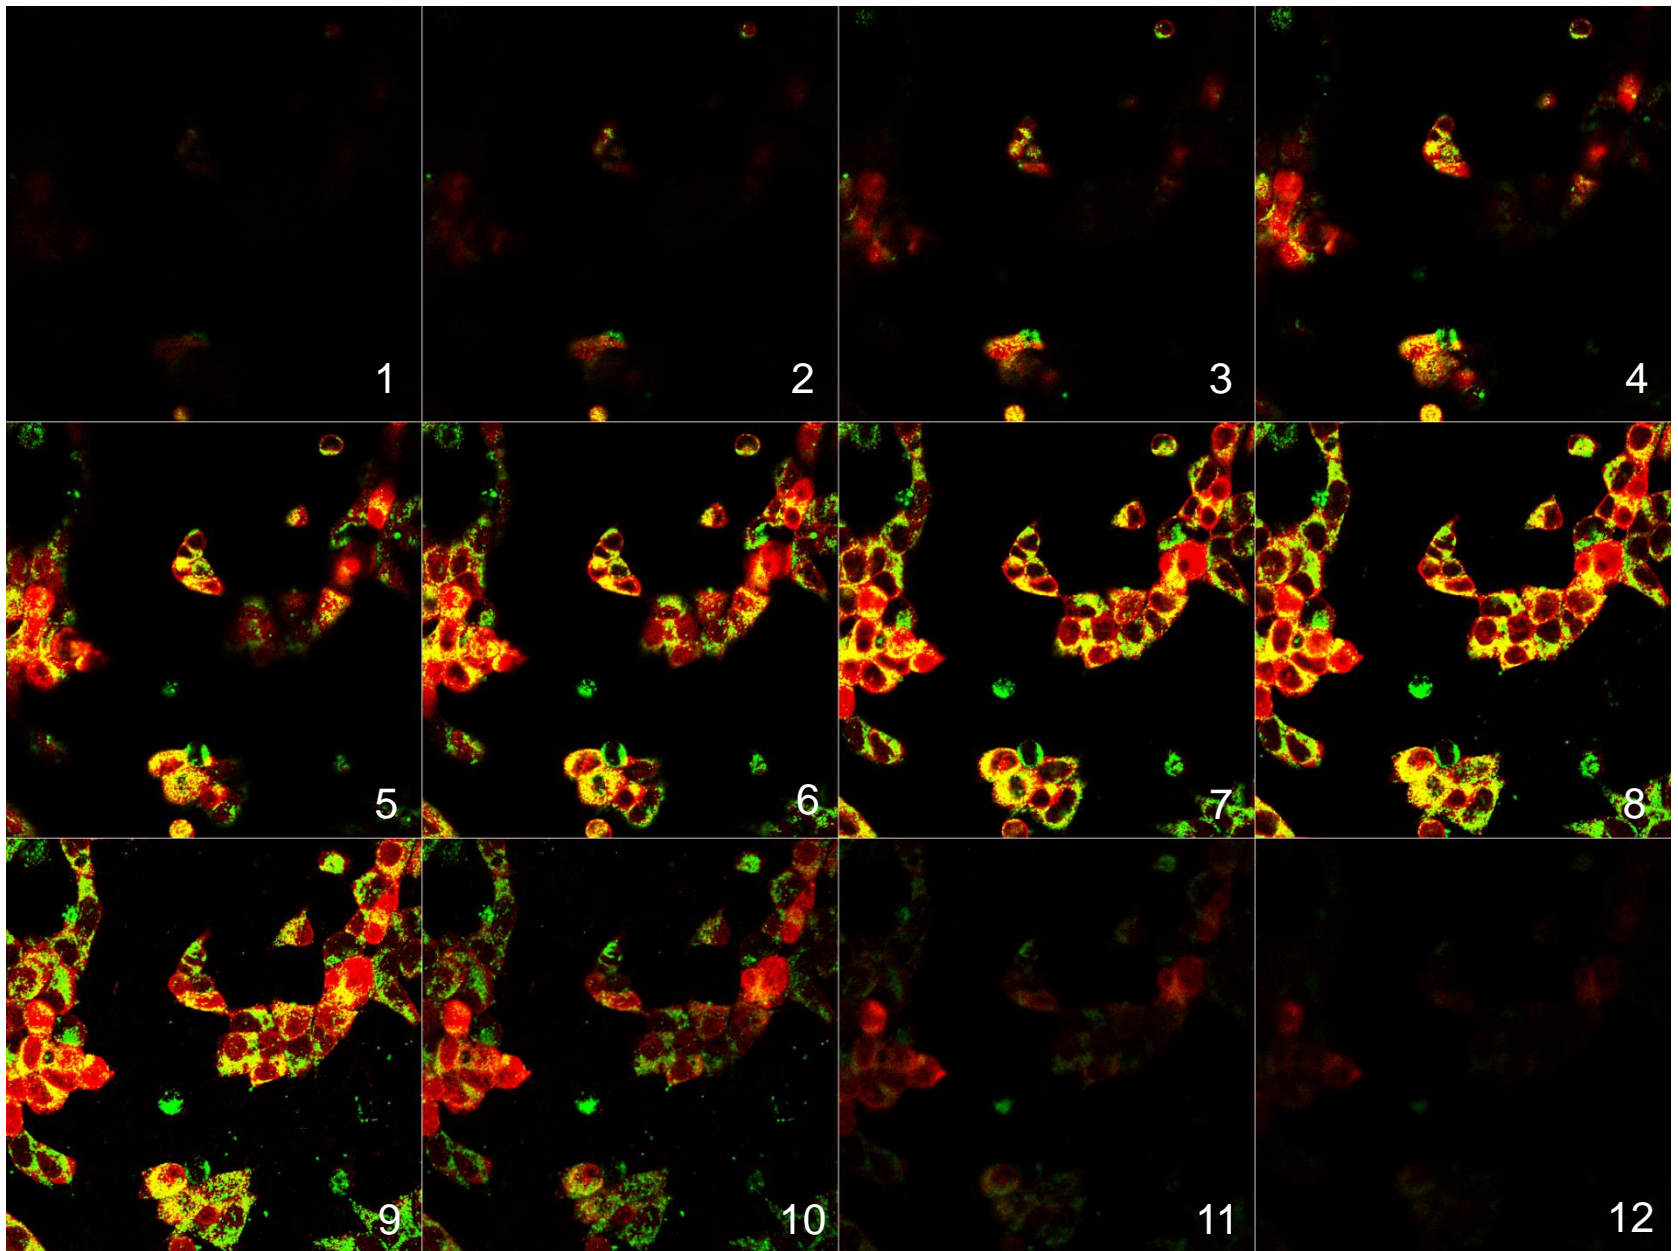

**Supplemental  
Figure 9B**

**Supplemental Figure 9. APOL1 co-localizes with mitochondria.**

B) Confocal immunofluorescence microscopy (630x) reveals the photo gallery of HEK293 Tet-on G0 with Dox induction as representative of APOL1 co-localization with mitochondria. To sufficiently display the location of APOL1 and mitochondria, only the fluorescent signals of APOL1 (red) and ATP synthase 5A1 (ATP5A1; green), a mitochondria marker, are shown in the serial photo gallery (1-12) for the z-stack model (1 $\mu$ m depth for each scan). Fluorescent signals for APOL1 (red) are present in mitochondria (green) and beyond.

**A****APOL1**

mitochondria

**APOL1**

mitochondria

DAPI

Dox (-)

Dox (+) 4hr

Dox(+) 8hr

Supplemental Figure 10

HEK293 Tet-on EV cells

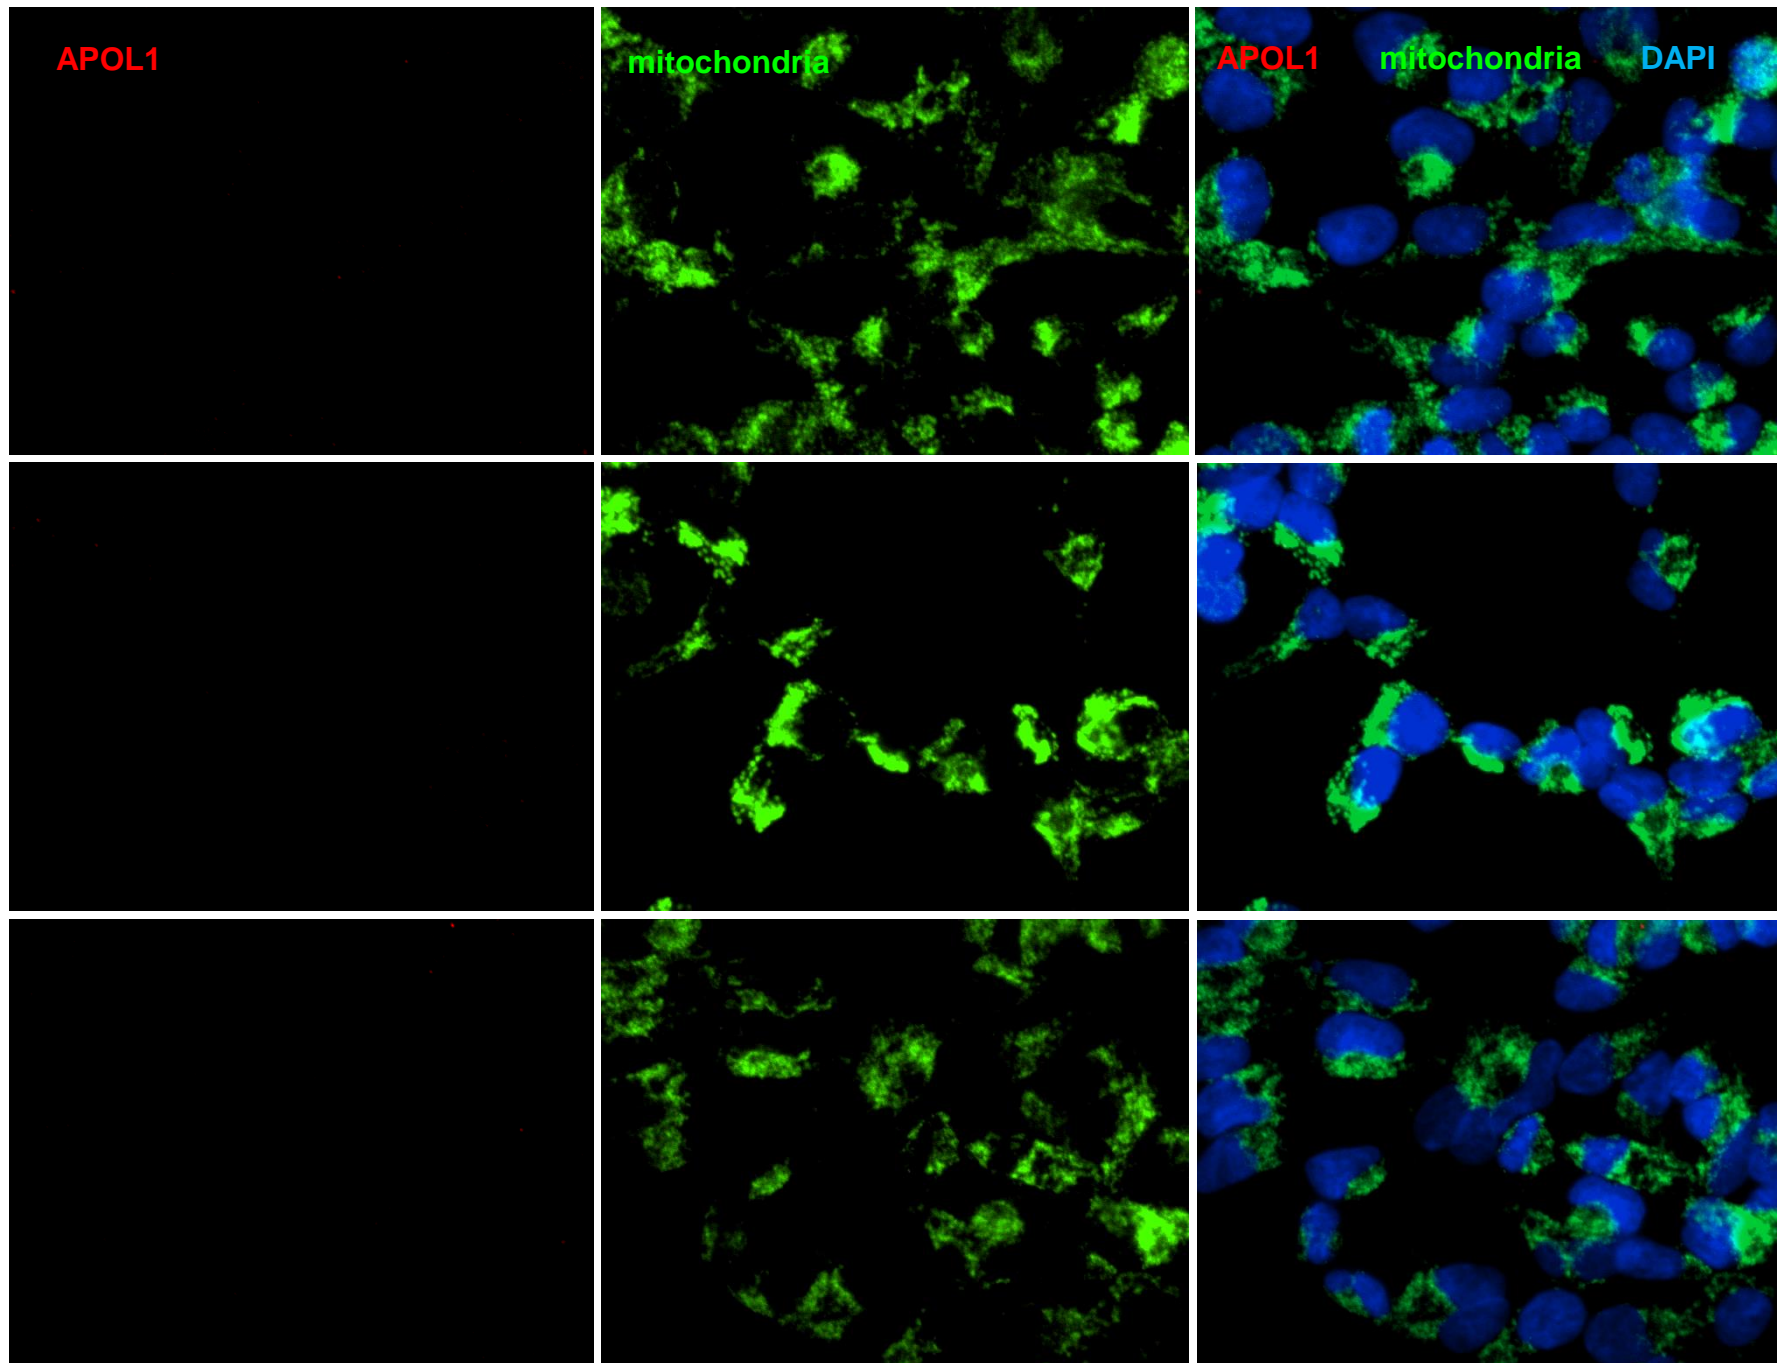

B

Dox (-)

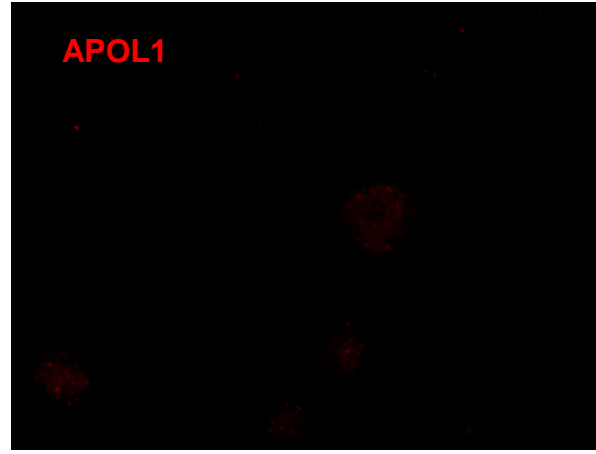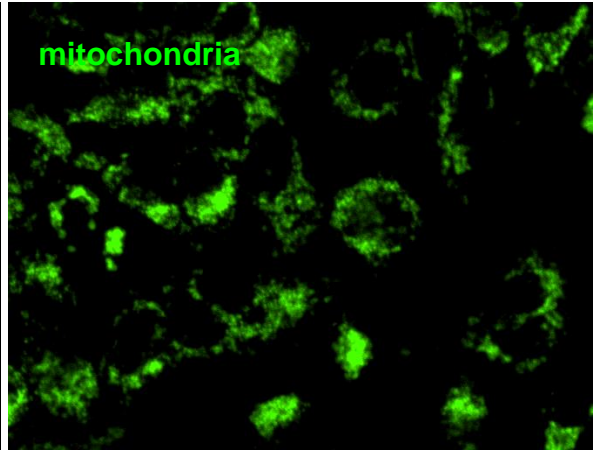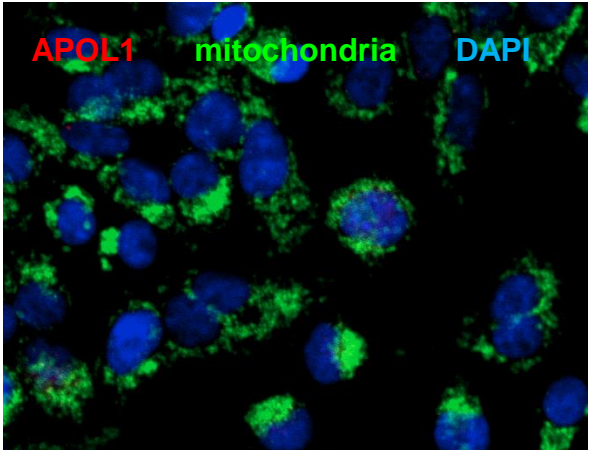

Dox (+) 4hr

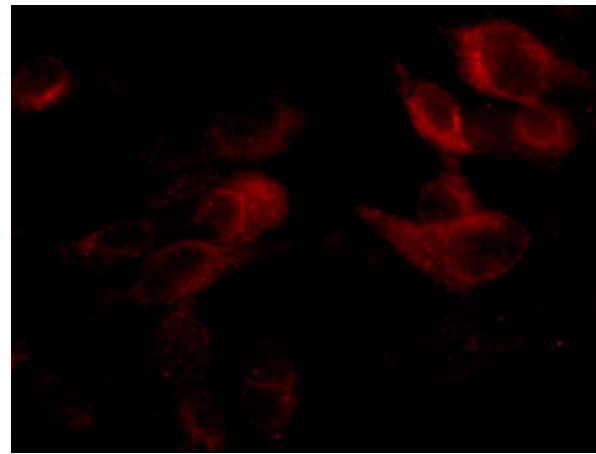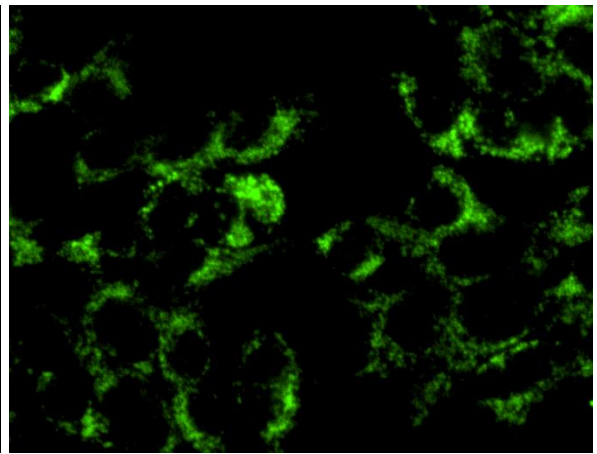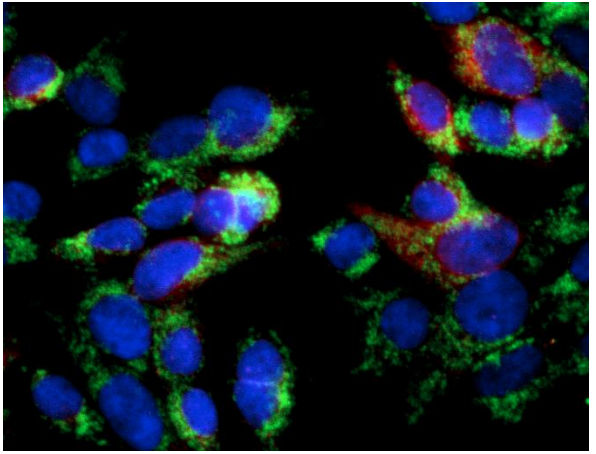

Dox (+) 8hr

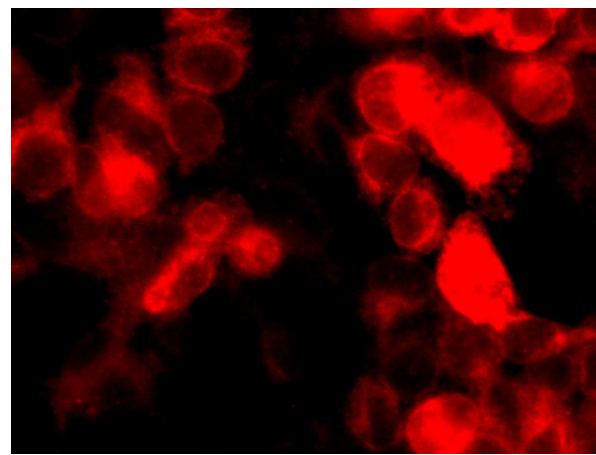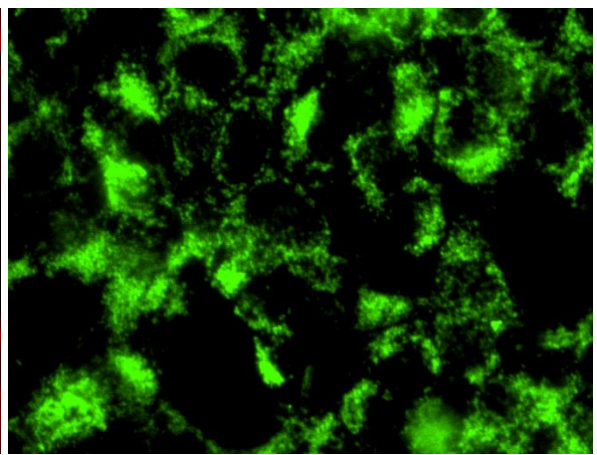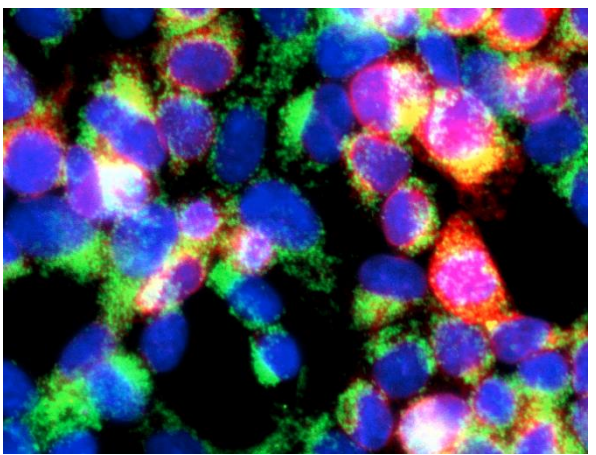

Supplemental Figure 10

HEK293 Tet-on G0 cells

C

Dox (-)

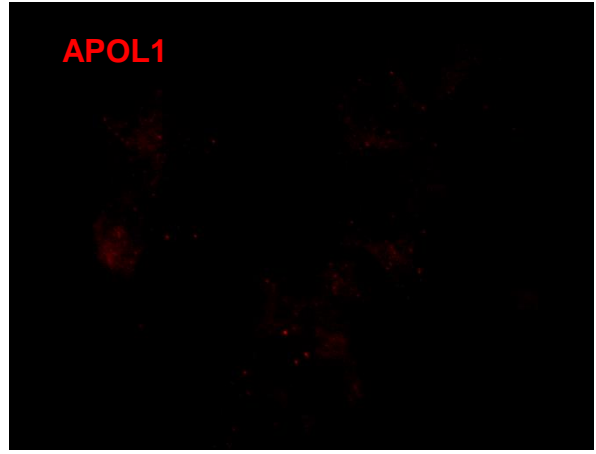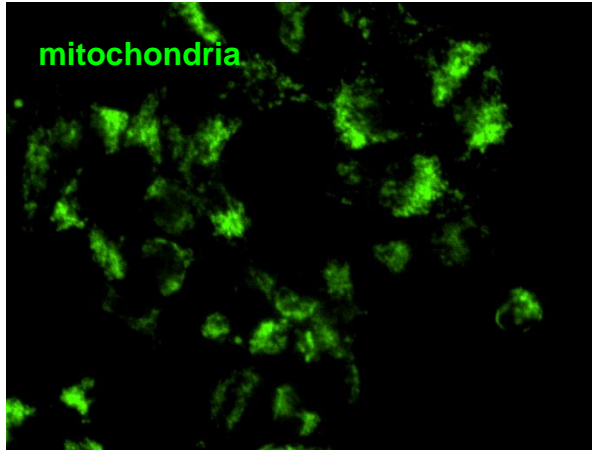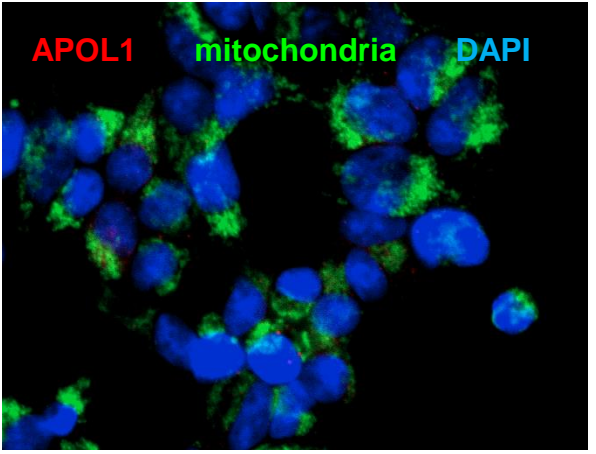

Dox (+) 4hr

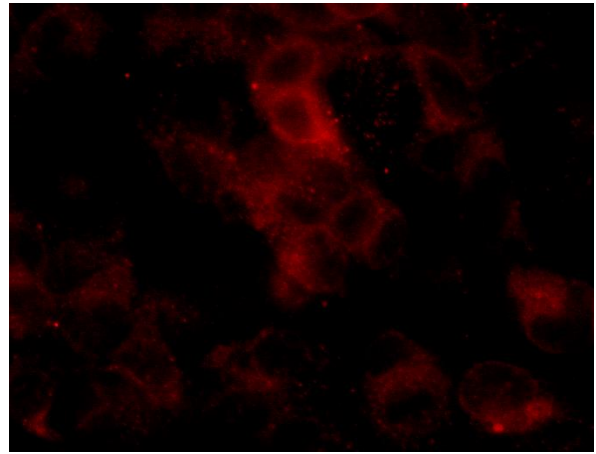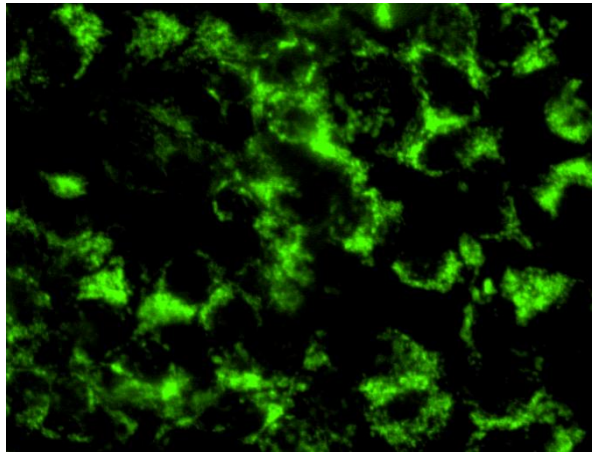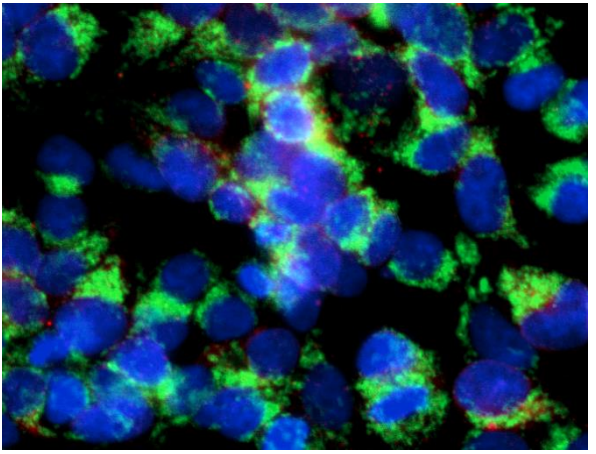

Dox(+) 8hr

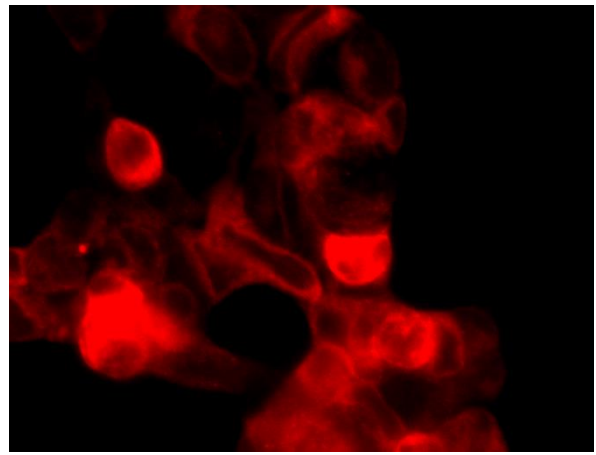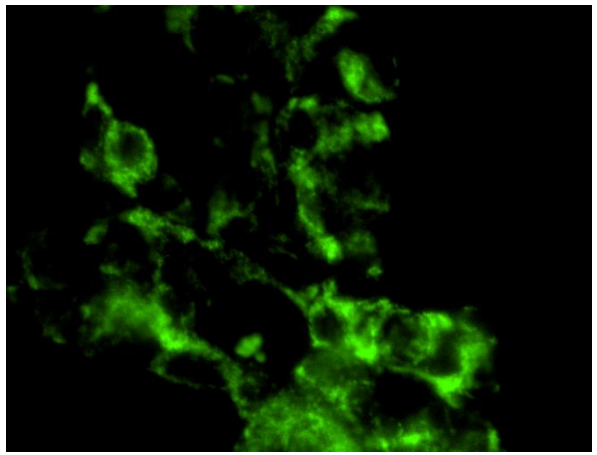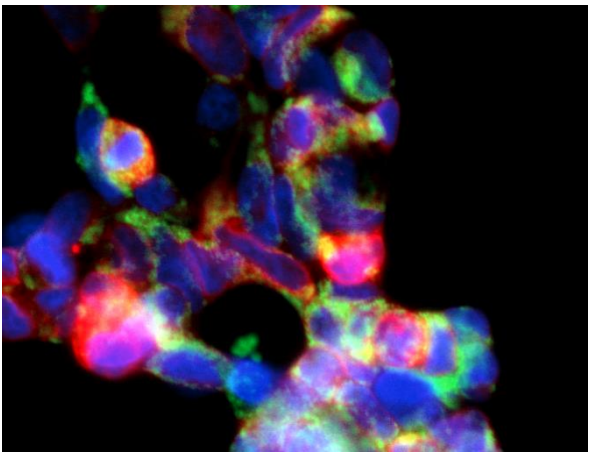

Supplemental Figure 10

HEK293 Tet-on G1 cells

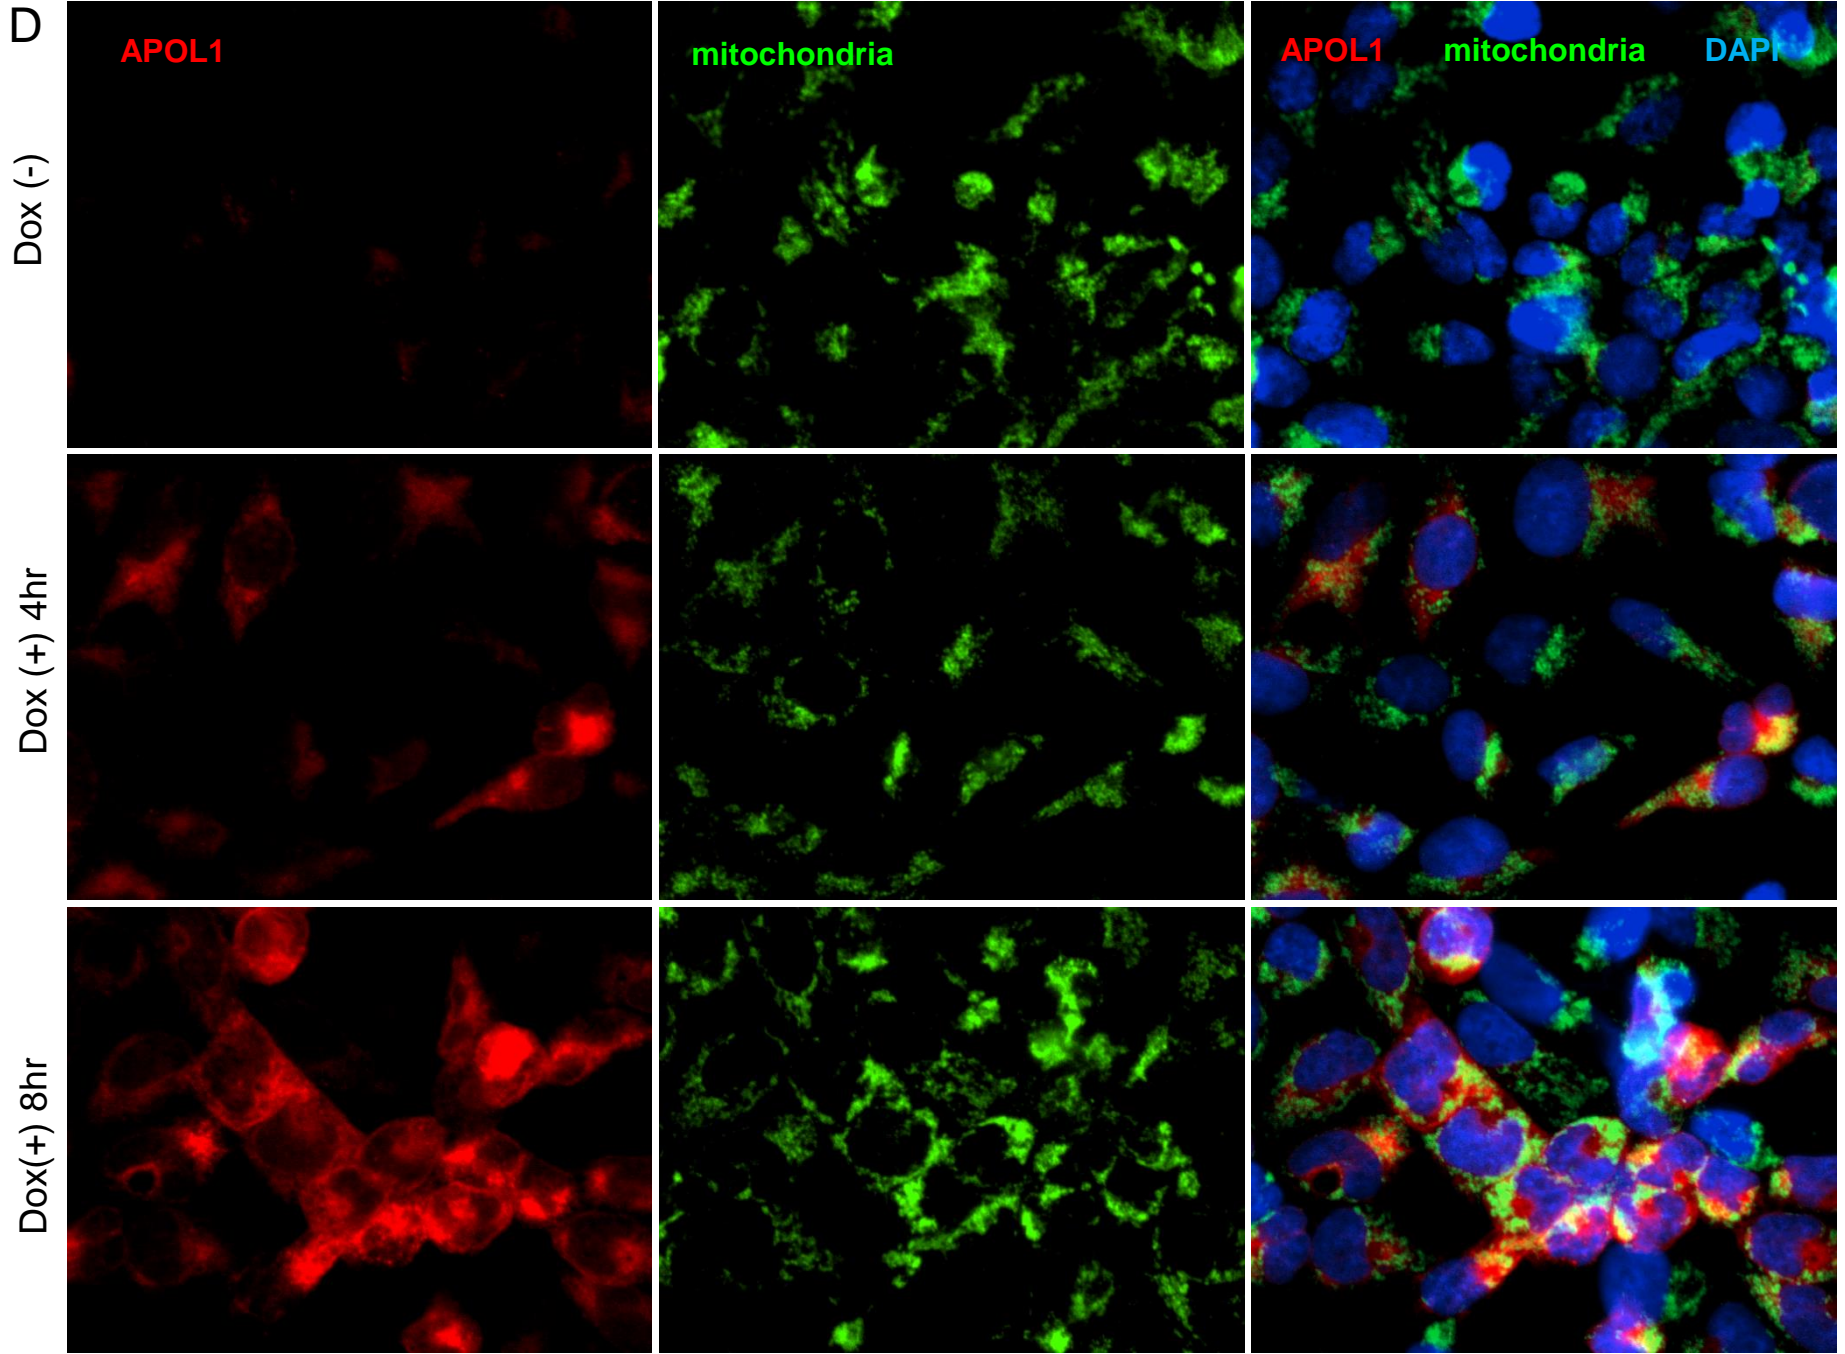

Supplemental Figure 10

HEK293 Tet-on G2 cells

## **Supplemental Figure 10. APOL1 co-localizes with mitochondria in HEK293 Tet-on *APOL1* G0, G1 and G2 cells with Dox induction**

HEK293 Tet-on empty vector (EV), G0, G1 and G2 cells (panels A, B, C, and D respectively) in the absence of Dox and after 4hr or 8hr Dox induction were washed with PBS and fixed with 4% paraformaldehyde. Cells were stained for APOL1 (red) with Epitomics anti-APOL1 antibody, mitochondria (green) with ATP synthase 5 A1 (ATP5A1) antibody and counterstained with nuclear dye DAPI (blue). No APOL1 was present in empty vector cells with (+) or without (-) Dox induction. Trace amounts of APOL1 were present in G0, G1 and G2 cells without (-) Dox induction; elevated APOL1 was observed in G0, G1 and G2 cells with (+) Dox induction for 4 hr; substantially elevated APOL1 was observed in G0, G1 and G2 cells with (+) Dox induction for 8 hr.

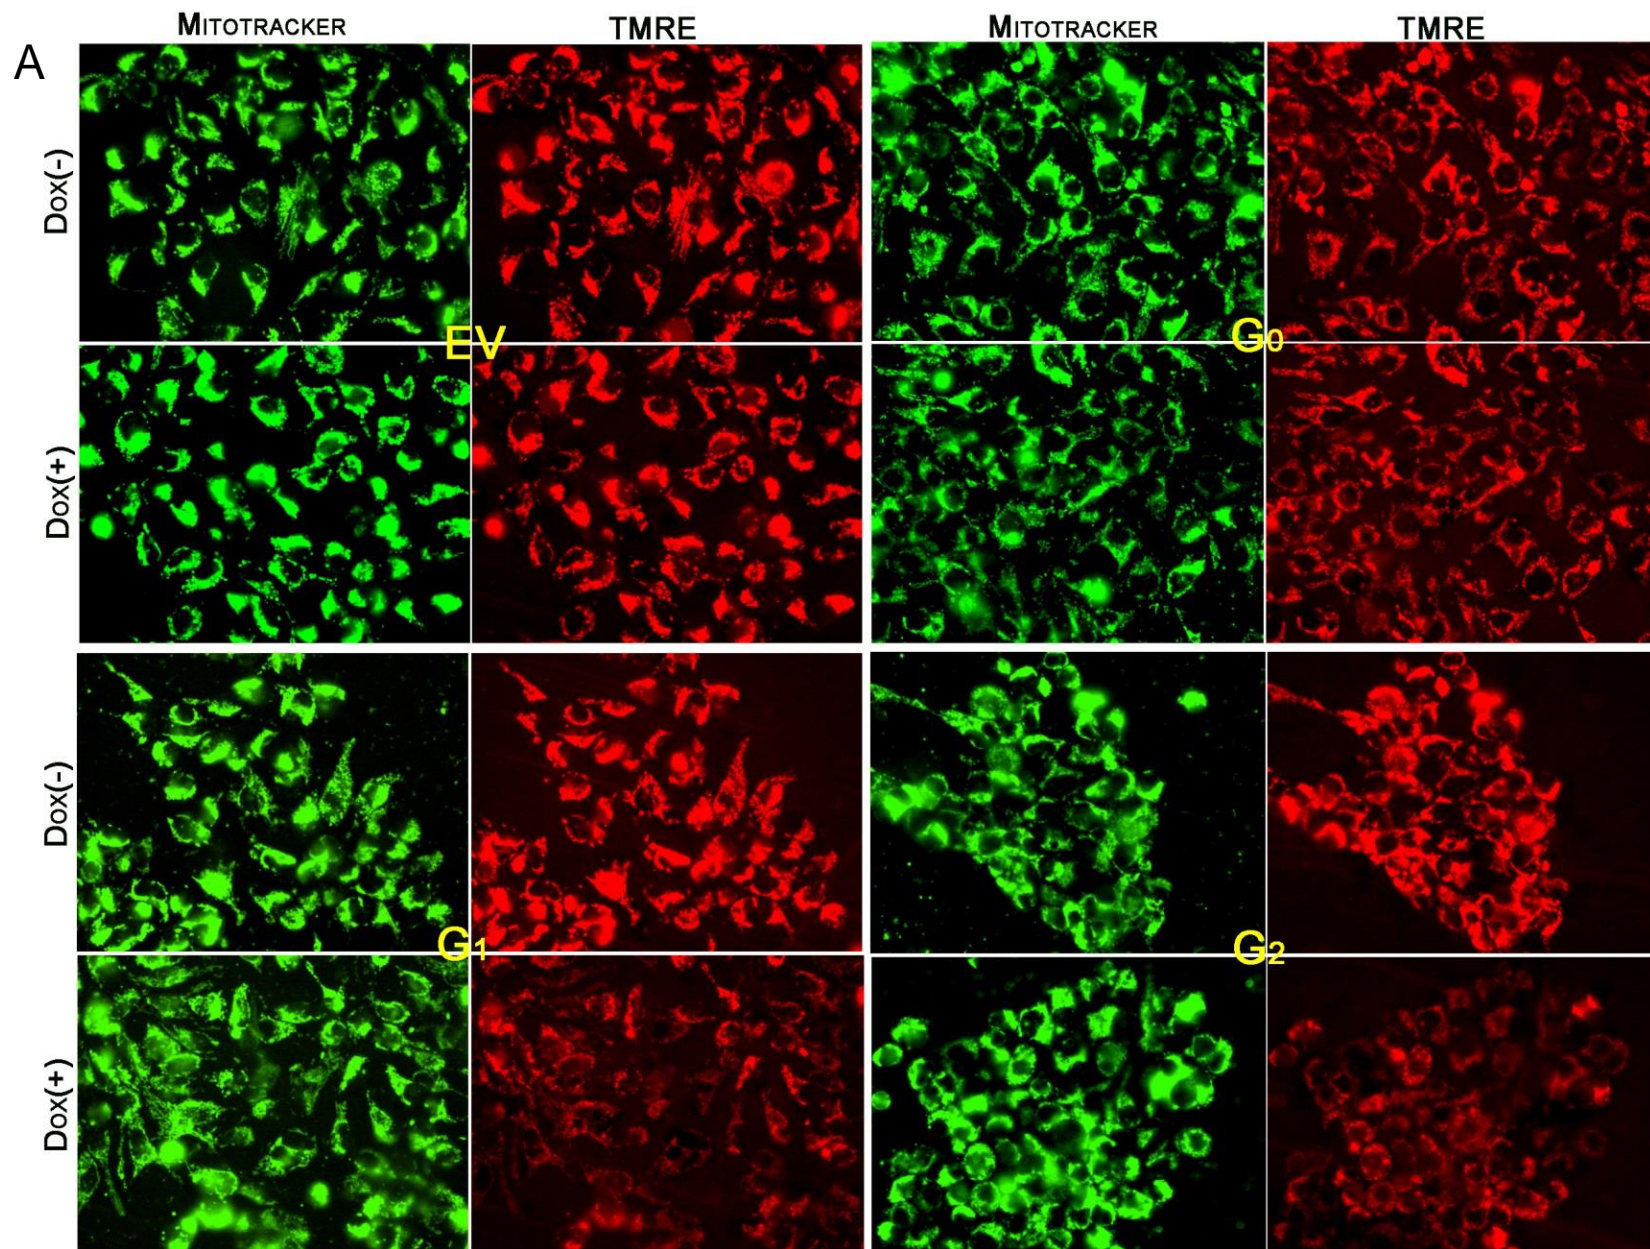

Supplemental  
Figure 11



**Supplemental Figure 11. Mitochondrial membrane potential is reduced in Dox-reduced HEK293 Tet-on *APOL1* G1 and G2 cells.**

A) HEK293 Tet-on cells stably expressing *APOL1* G0, G1, or G2 were grown with (+) or without (-) Dox for 7.5 hr in full DMEM media. Cells were subsequently incubated for 30 min with a final concentration of 50 nM mitotracker green (Invitrogen) and 10 nM TMRE (Tetramethylrhodamine ethyl ester, Invitrogen), a live cell fluorescence marker of mitochondrial membrane potential. Mitochondrial mass did not differ across HEK293 Tet-on *APOL1* cells (+/-) Dox induction, indicated by constant mitochondrial green signals. However, HEK293 Tet-on G1 and G2 cells appeared to lose mitochondrial membrane potential when induced by Dox.

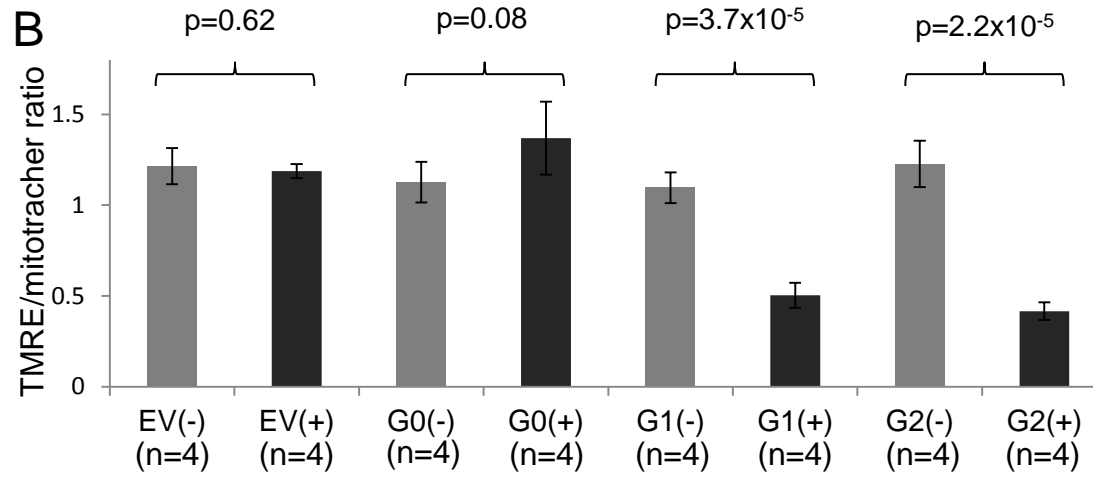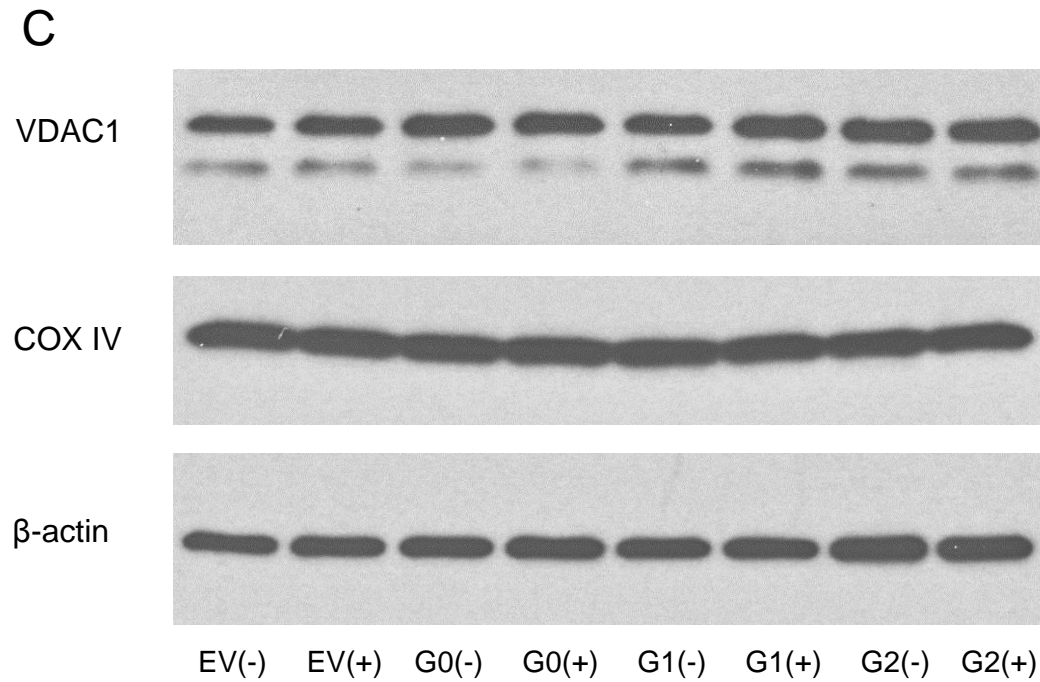

Supplemental  
Figure 11

**Supplemental Figure 11. Mitochondrial membrane potential is reduced in Dox-reduced HEK293 Tet-on *APOL1* G1 and G2 cells.**

B) Reduced fluorescence signal ratio of mitochondrial membrane potential (TMRE) and mitotracker green in HEK293 Tet-on G1 and G2 cells with Dox induction. Fluorescence signals of TMRE and mitotracker green were captured using an Olympus IX71 fluorescence microscope on four different fields/groups of each type of HEK293 Tet-on cells of *APOL1* genotype (+/-) Dox induction. Fluorescence signals were measured by Image J (<http://imagej.nih.gov/ij/>). A paired t-test was used to estimate the TMRE/mitotracker ratio difference for cells with (+) and without (-) Dox induction after correction for non-specific background.

C) Mitochondrial protein expression remains constant in HEK293 Tet-on cells with and without Dox induction. Stabilized HEK293 Tet-on cells grown with (+) or without (-) Dox were lysed and fractionated by SDS-PAGE, then probed with antibodies for mitochondrial proteins COXIV and porin/VDAC1. *APOL1* G1 and G2 renal-risk variants did not alter mitochondrial mass, relative to G0 (reference), with or without Dox induction.

EV: HEK293 Tet-on cell line with empty pTRE2hyg plasmid.

HEK293 EV cells

Mitotracker

TMRE

A

FCCP (-)

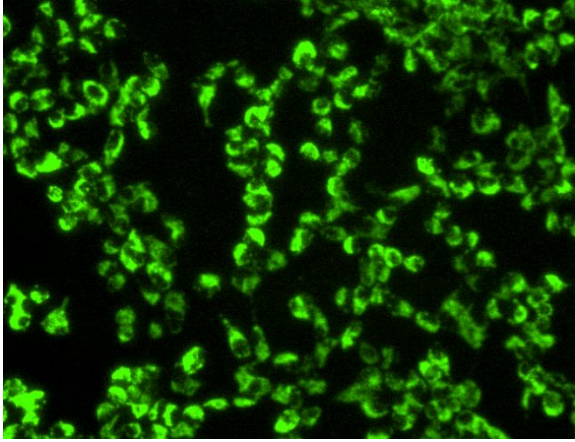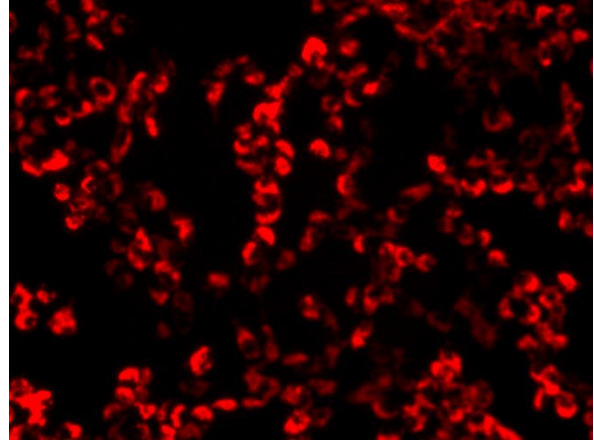

0.25  $\mu$ M FCCP

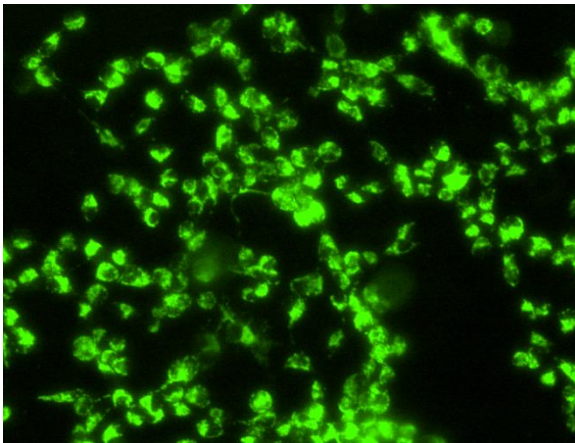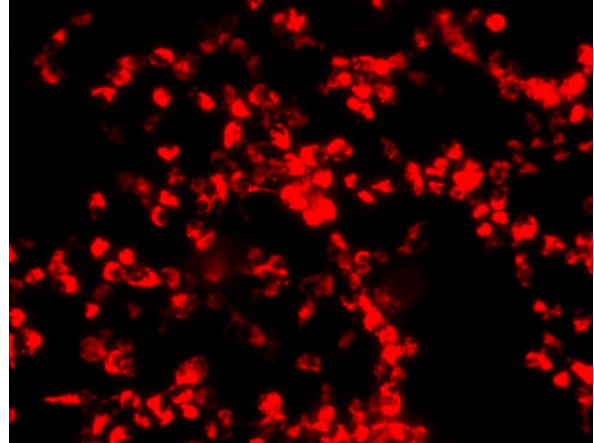

1.0  $\mu$ M FCCP

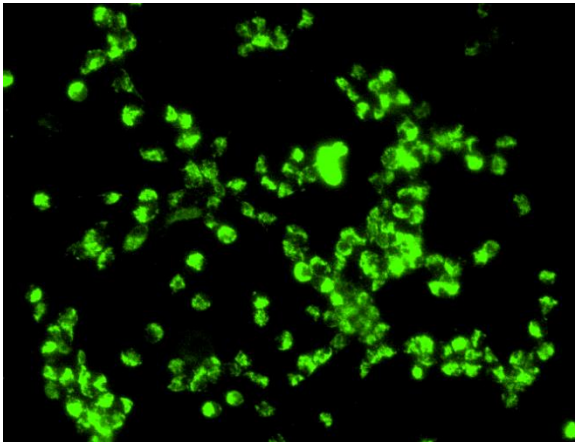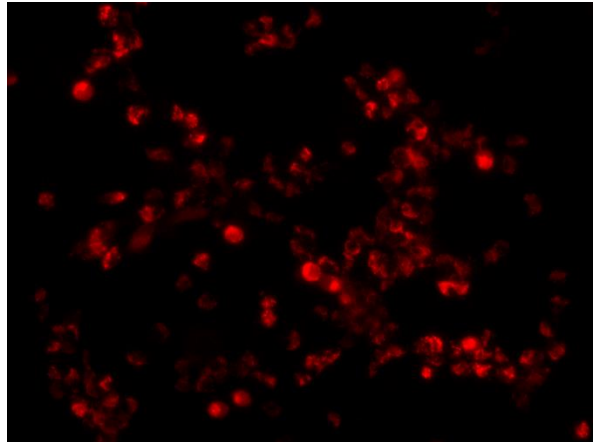

Supplemental  
Figure 12

HEK293 G0 cells

B

Mitotracker

TMRE

FCCP (-)

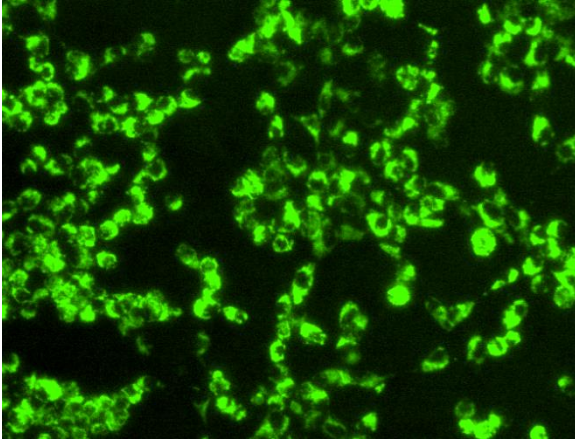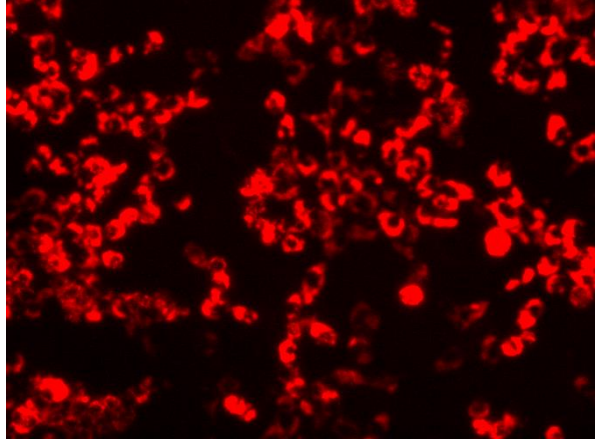

0.25  $\mu$ M FCCP

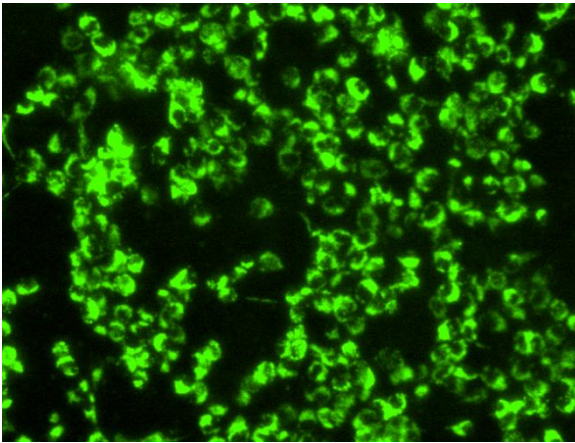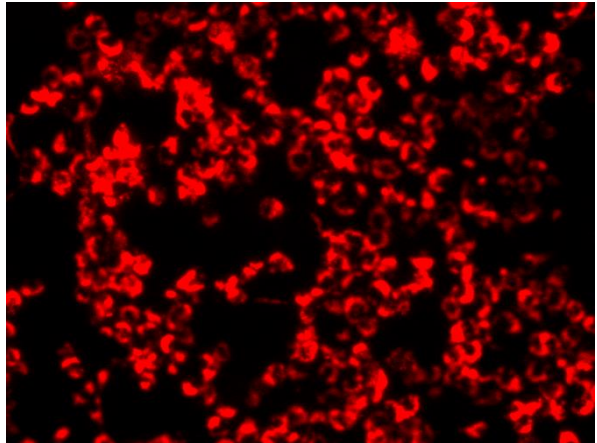

1.0  $\mu$ M FCCP

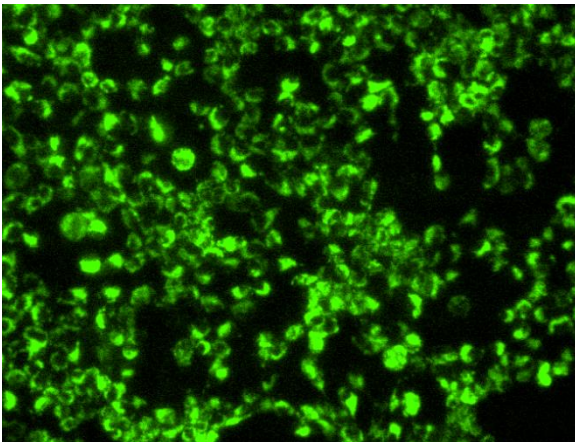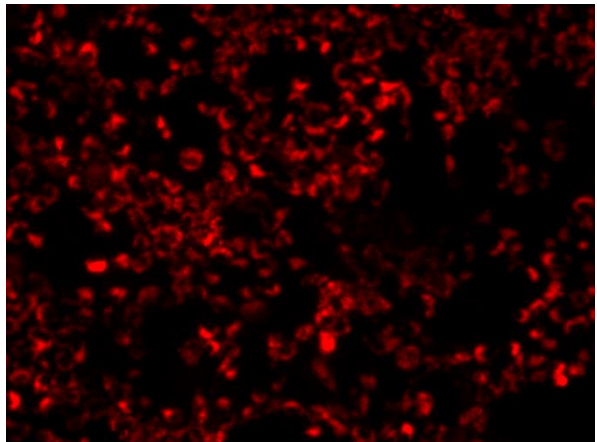

Supplemental  
Figure 12

HEK293 G1 cells

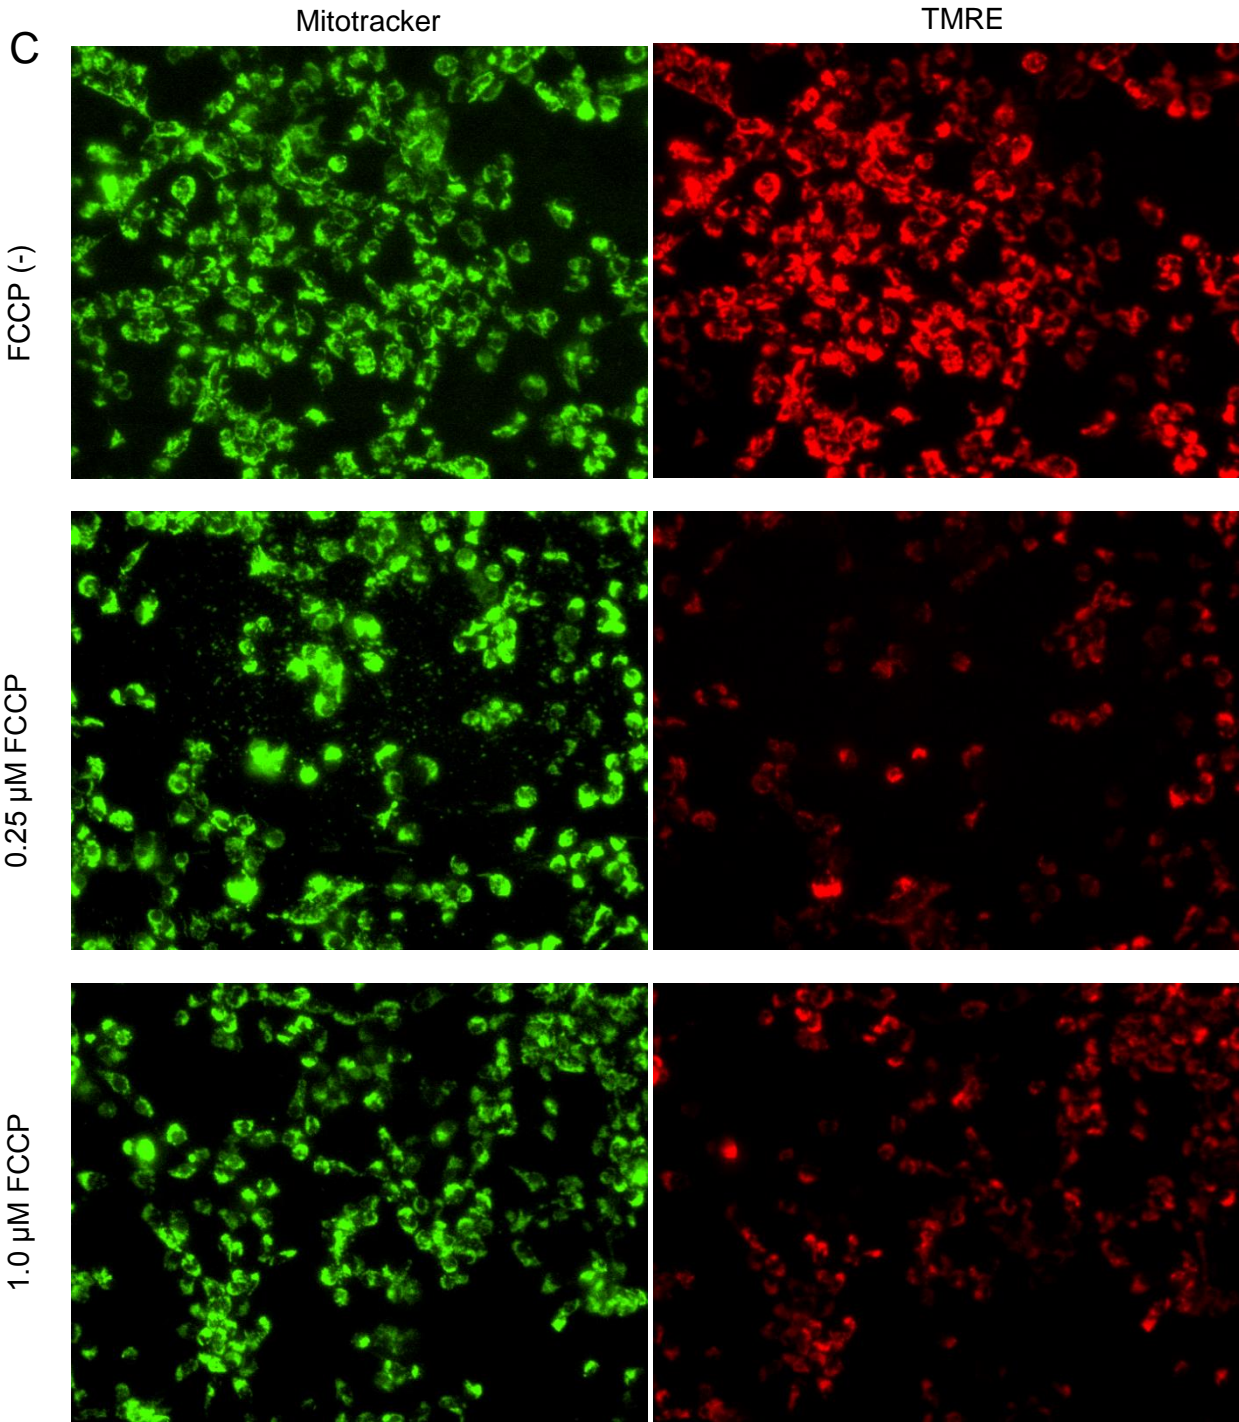

Supplemental  
Figure 12

HEK293 G2 cells

Mitotracker

TMRE

D

FCCP (-)

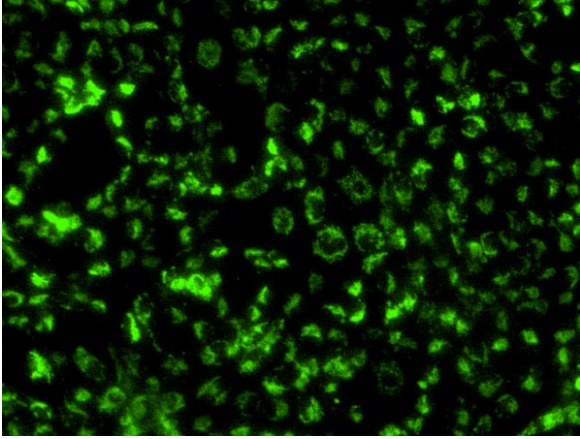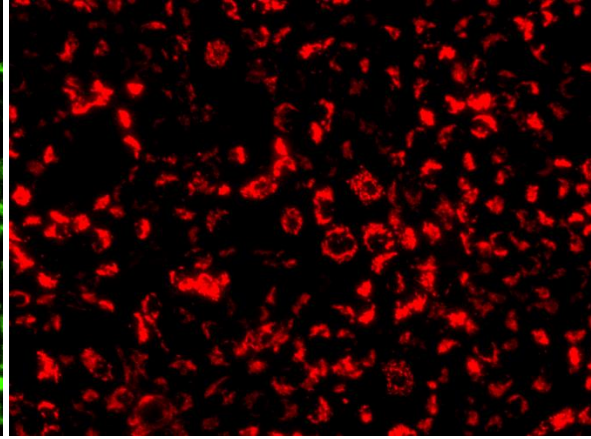

0.25  $\mu$ M FCCP

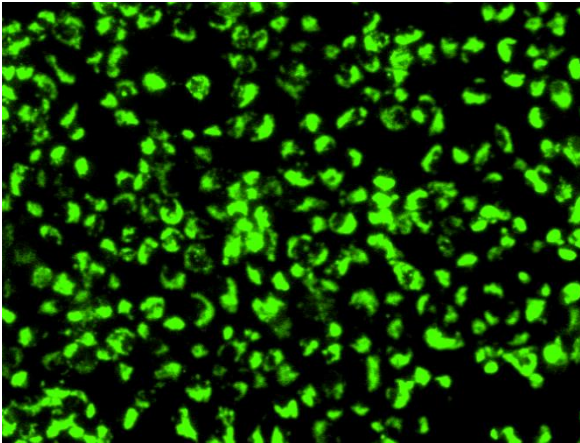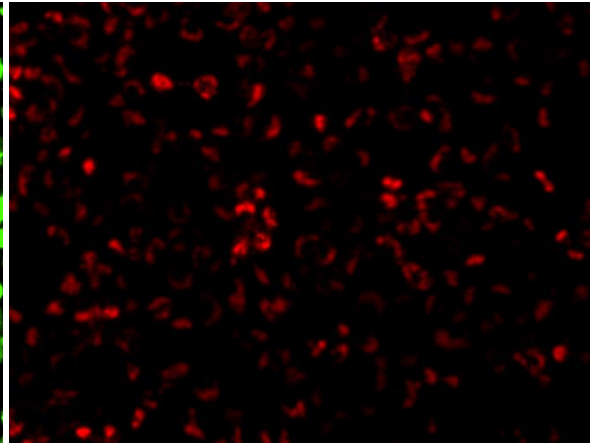

1.0  $\mu$ M FCCP

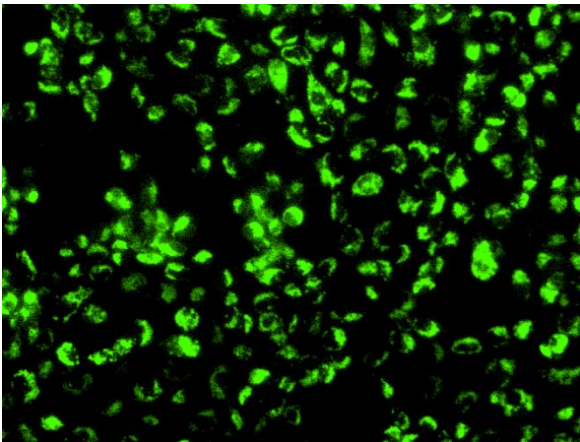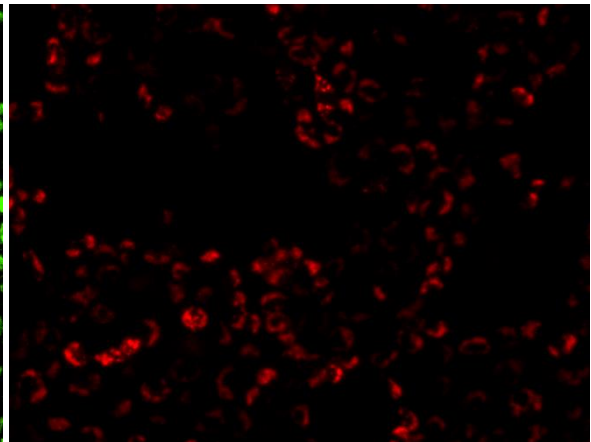

Supplemental  
Figure 12

## Supplemental Figure 12. Mitochondrial membrane potential declines in HEK293 Tet-on cells with FCCP incubation

Non-induced HEK293 Tet-on empty vector (EV), G0, G1 and G2 cells (panels A, B, C and D, respectively) were incubated for 30 min with a final concentration of 50 nM mitotracker green (Invitrogen) and 10 nM TMRE (Tetramethylrhodamine ethyl ester, Invitrogen), a live cell fluorescence marker of mitochondrial membrane potential, on a 96-well cell culture plate. FCCP was subsequently added to culture media in final concentrations of 0.25  $\mu\text{M}$  and 1.0  $\mu\text{M}$  for 30 minutes, respectively, in cells of different genotypes together with FCCP-free cells as controls. Cell images were captured by an Olympus IX71 fluorescence microscope. The mitochondrial membrane potential remained virtually intact for EV and G0 cells treated with 0.25  $\mu\text{M}$  FCCP; however, reduced mitochondrial membrane potential was observed in G1 and G2 cells treated with 0.25  $\mu\text{M}$  FCCP. When EV, G0, G1 and G2 cells were treated with 1.0  $\mu\text{M}$  FCCP, all types cells appeared to display reduced mitochondrial membrane potential.



## **Supplemental Video**

**Supplemental Video 1. Co-localization of APO1 with mitochondria in Dox-induced HEK293 Tet-on G0 cells as assessed by confocal microscopy images (z-stack model).** Serial confocal immunofluorescence microscopy (630x) was performed to form the animated video of 1  $\mu\text{m}$  depth per scan for HEK293 Tet-on G0 wells, as representative of all HEK293 *APO1* cells with Dox induction for 8 hr. After washing with PBS, cells were stained for APO1 (red), mitochondria (ATP5A1; green), corresponding to Supplemental Figure 9.

Supplemental Table 1. Top 20 pathways revealed from most differentially expressed 1056 genes by Dox-induced *APOL1* over-expression in the HEK293 G0 Tet-on cell line using Cytoscape BiNGO

| GO-ID | Description                                  | x   | n     | X   | N     | p-value  | FDR p-value |
|-------|----------------------------------------------|-----|-------|-----|-------|----------|-------------|
| 43231 | intracellular membrane-bounded organelle     | 539 | 8338  | 901 | 17758 | 1.26E-15 | 3.72E-12    |
| 43227 | membrane-bounded organelle                   | 539 | 8345  | 901 | 17758 | 1.54E-15 | 3.72E-12    |
| 5634  | nucleus                                      | 349 | 5181  | 901 | 17758 | 1.66E-10 | 1.80E-07    |
| 3676  | nucleic acid binding                         | 240 | 3254  | 901 | 17758 | 1.66E-10 | 1.80E-07    |
| 44424 | intracellular part                           | 643 | 10939 | 901 | 17758 | 1.86E-10 | 1.80E-07    |
| 34641 | cellular nitrogen compound metabolic process | 168 | 2080  | 901 | 17758 | 3.30E-10 | 2.66E-07    |
| 5622  | intracellular                                | 656 | 11291 | 901 | 17758 | 1.04E-09 | 7.20E-07    |
| 44237 | cellular metabolic process                   | 334 | 4990  | 901 | 17758 | 1.28E-09 | 7.72E-07    |
| 44260 | cellular macromolecule metabolic process     | 250 | 3511  | 901 | 17758 | 1.95E-09 | 1.05E-06    |
| 43226 | organelle                                    | 558 | 9327  | 901 | 17758 | 3.25E-09 | 1.54E-06    |
| 43229 | intracellular organelle                      | 557 | 9313  | 901 | 17758 | 3.69E-09 | 1.54E-06    |
| 6807  | nitrogen compound metabolic process          | 171 | 2198  | 901 | 17758 | 3.82E-09 | 1.54E-06    |
| 33554 | cellular response to stress                  | 66  | 622   | 901 | 17758 | 1.04E-08 | 3.86E-06    |
| 44238 | primary metabolic process                    | 344 | 5287  | 901 | 17758 | 1.80E-08 | 5.94E-06    |
| 3677  | DNA binding                                  | 176 | 2329  | 901 | 17758 | 1.84E-08 | 5.94E-06    |
| 90304 | nucleic acid metabolic process               | 122 | 1464  | 901 | 17758 | 2.39E-08 | 7.23E-06    |
| 8152  | metabolic process                            | 379 | 5955  | 901 | 17758 | 2.63E-08 | 7.49E-06    |
| 44238 | primary metabolic process                    | 344 | 5287  | 901 | 17758 | 1.80E-08 | 5.94E-06    |
| 3677  | DNA binding                                  | 176 | 2329  | 901 | 17758 | 1.84E-08 | 5.94E-06    |
| 90304 | nucleic acid metabolic process               | 122 | 1464  | 901 | 17758 | 2.39E-08 | 7.23E-06    |

Note: x, number of gene IDs identified in the designated pathway among input gene IDs; X, number of input gene IDs selected by BiNGO; n, number of known gene IDs in the designated pathway; N, number of background gene IDs selected from the GO pool by BiNGO. Replicated pathways in the subsequent Ingenuity pathway analysis are shown in red. P values are shown as scientific E notation (e.g. 2.00E-5 is equivalent to  $2.00 \times 10^{-5}$ ) hereafter throughout the supplemental tables.

Supplemental Table 2. Top canonical pathways detected based on the most differentially expressed genes by Dox-induced *APOL1* over-expression (HEK293 G0 Tet-on cell line using Ingenuity pathway analysis)

| Ingenuity Canonical Pathways            | p-value  | Molecules                                                                                                                 |
|-----------------------------------------|----------|---------------------------------------------------------------------------------------------------------------------------|
| Unfolded protein response               | 9.05E-07 | MAP2K7,HSPA14,DDIT3,INSIG1,XBP1,CEBPB,DNAJB9,HSPA5,CEBPG,BCL2,SEL1L,EDEM1,ERO1LB                                          |
| ERK5 Signaling                          | 1.50E-04 | MYC,FOS,SGK1,MEF2D,GNA12,MAP3K8,RPS6KA1,RPS6KA2,CREB3L4,ATF2,MAP3K2                                                       |
| NRF2-mediated Oxidative Stress Response | 3.13E-04 | MAP2K7,MAPK1,PIIB,DNAJC19,MAF,HSPB8,HERPUD1,DNAJC10,DNAJB9,MAFF,BACH1,MAFG,FOS,AKR1A1,SOD2,JUN,MAP2K3,GSK3B,UBE2E3,DNAJB6 |
| p38 MAPK Signaling                      | 3.77E-04 | ATF1,DDIT3,SRF,CREB3L4,MAPK12,ATF2,MYC,DUSP1,MEF2D,DUSP10,MAP2K3,RPS6KA2,EEF2K,RPS6KA1,TAB1                               |
| tRNA Charging                           | 3.82E-04 | WARS,CARS,GARS,EARS2,AARS,SARS,IARS,EPRS                                                                                  |

Replicated pathways in the prior BiNGO pathway analysis (Table S1) are shown in red.

Supplemental Table 3. Top five upstream regulators detected based on the most differentially expressed genes by Dox-induced *APOL1* over-expression (HEK293 G0 Tet-on cell line using Ingenuity Pathway Analysis)

| Upstream Regulator | Predicted Activation State | Activation z-score | p-value  | Target molecules in dataset                                                                                                                                                                                                   |
|--------------------|----------------------------|--------------------|----------|-------------------------------------------------------------------------------------------------------------------------------------------------------------------------------------------------------------------------------|
| <b>ATF4</b>        | Inhibited                  | -3.56              | 4.53E-20 | AARS,ASNS,BCAT1,CEBPB,CEBPG,CHAC1,CTH,DDIT3,DDIT4,EIF2S2,EIF4EBP1,GARS,GDF15,HERPUD1,HSPA5,IGFBP5,JUN,KLF4,MTHFD2,PCK2,PSAT1,PSPH,PYCR1,SARS,SEL1L,SHMT2,SIGMAR1,SLC38A2,SLC3A2,SLC6A9,SLC7A5,STC2,TNFRSF12A,TRIB3,WARS,XPOT, |
| tosedostat         | Inhibited                  | -3.184             | 7.46E-16 | ASNS,ASS1,CARS,CBS/LOC102724560,CEBPB,CHAC1,CTH,CXCL8,DDIT3,DDIT4,PSAT1,SARS,SLC38A2,SLC7A11,STC2,TRIB3,WARS,                                                                                                                 |
| TRIB3              | Activated                  | 3.346              | 1.18E-14 | ASNS,CDC25A,CTH,DDIT3,DDIT4,GARS,GDF15,HERPUD1,ID1,MTHFD2,PCK2,PSAT1,PSPH,STC2,TRIB3,                                                                                                                                         |
| <b>tunicamycin</b> | Inhibited                  | -3.464             | 6.04E-14 | ASNS,ATP2A2,CCND1,CEBPB,CPT2,CREB3L2,DDIT3,DDIT4,DNAJB9,EDEM1,EDEM2,EGR1,ERO1LB,GADD45B,GPT2,HERPUD1,HSPA5,KLF4,LONP1,MANF,MTDH,MYC,NFKBIA,PCK2,PDIA6,PLIN2,SDF2L1,SEL1L,SIGMAR1,SLC7A11,WFS1,XBP1,                           |
| <b>XBP1</b>        | Inhibited                  | -4.709             | 1.25E-12 | ATP2A2,BCL2,BET1,COPG1,CRK,CXCL8,DDIT3,DNAJB9,DNAJC10,EDEM1,EDEM2,ERO1LB,FKBP11,FKBP14,FKBP2,GOSR2,HERPUD1,HSPA5,HYOU1,KDEL3,KLF4,MYC,PDIA4,PDIA6,PPIB,SDF2L1,SEC11C,SEC23B,SEC24D,SEC63,SERP1,SPCS3,SSR1,STX5,TXNDC5,WFS1,   |

Related regulators of the ER stress pathway detected in the prior analyses (Supplemental Table 1 & 2), are shown in red. |Activation Z score|>3.

Supplemental Table 4. Top pathways revealed from most differentially expressed genes by Dox-induced *APOL1* in the HEK293 G1 Tet-on cell line using Cytoscape BiNGO

| GO-ID | Description                                                                                                   | x   | n     | X    | N     | p-value  | FDR p-value |
|-------|---------------------------------------------------------------------------------------------------------------|-----|-------|------|-------|----------|-------------|
|       | <b>Top 20 significant pathways enriched in 1357 qualified transcripts</b>                                     |     |       |      |       |          |             |
| 5634  | nucleus                                                                                                       | 475 | 5183  | 1140 | 17760 | 1.00E-20 | 5.49E-17    |
| 43231 | intracellular membrane-bounded organelle                                                                      | 677 | 8338  | 1140 | 17760 | 2.19E-18 | 5.07E-15    |
| 43227 | membrane-bounded organelle                                                                                    | 677 | 8345  | 1140 | 17760 | 2.78E-18 | 5.07E-15    |
| 3676  | nucleic acid binding                                                                                          | 321 | 3253  | 1140 | 17760 | 2.42E-17 | 3.30E-14    |
| 44424 | intracellular part                                                                                            | 829 | 10941 | 1140 | 17760 | 2.34E-16 | 2.55E-13    |
| 5622  | intracellular                                                                                                 | 848 | 11293 | 1140 | 17760 | 6.45E-16 | 5.87E-13    |
| 30528 | transcription regulator activity                                                                              | 175 | 1507  | 1140 | 17760 | 2.50E-15 | 1.96E-12    |
| 10556 | regulation of macromolecule biosynthetic process                                                              | 283 | 2874  | 1140 | 17760 | 5.93E-15 | 4.05E-12    |
| 60255 | regulation of macromolecule metabolic process                                                                 | 318 | 3374  | 1140 | 17760 | 2.63E-14 | 1.60E-11    |
| 6357  | regulation of transcription from RNA polymerase II promoter                                                   | 104 | 747   | 1140 | 17760 | 3.57E-14 | 1.95E-11    |
| 10468 | regulation of gene expression                                                                                 | 283 | 2925  | 1140 | 17760 | 5.55E-14 | 2.59E-11    |
| 31323 | regulation of cellular metabolic process                                                                      | 343 | 3733  | 1140 | 17760 | 5.69E-14 | 2.59E-11    |
| 34641 | cellular nitrogen compound metabolic process                                                                  | 217 | 2082  | 1140 | 17760 | 8.30E-14 | 3.49E-11    |
| 3677  | DNA binding                                                                                                   | 235 | 2328  | 1140 | 17760 | 1.93E-13 | 7.52E-11    |
| 80090 | regulation of primary metabolic process                                                                       | 326 | 3551  | 1140 | 17760 | 3.88E-13 | 1.41E-10    |
| 45449 | regulation of transcription                                                                                   | 256 | 2619  | 1140 | 17760 | 4.54E-13 | 1.46E-10    |
| 9889  | regulation of biosynthetic process                                                                            | 288 | 3042  | 1140 | 17760 | 4.55E-13 | 1.46E-10    |
| 19222 | regulation of metabolic process                                                                               | 352 | 3916  | 1140 | 17760 | 5.14E-13 | 1.56E-10    |
| 44237 | cellular metabolic process                                                                                    | 428 | 4989  | 1140 | 17760 | 5.49E-13 | 1.58E-10    |
| 43233 | organelle lumen                                                                                               | 181 | 1680  | 1140 | 17760 | 8.59E-13 | 2.26E-10    |
|       | <b>Top 10 significant pathways enriched in 695 qualified transcripts down-regulated by G1 over-expression</b> |     |       |      |       |          |             |
| 5739  | mitochondrion                                                                                                 | 95  | 1270  | 579  | 17779 | 1.24E-14 | 4.07E-11    |
| 34641 | cellular nitrogen compound metabolic process                                                                  | 121 | 2081  | 579  | 17779 | 9.22E-11 | 1.51E-07    |
| 8152  | metabolic process                                                                                             | 266 | 5957  | 579  | 17779 | 1.94E-10 | 2.12E-07    |

|       |                                                                                                             |     |      |     |       |          |          |
|-------|-------------------------------------------------------------------------------------------------------------|-----|------|-----|-------|----------|----------|
| 6807  | nitrogen compound metabolic process                                                                         | 123 | 2199 | 579 | 17779 | 7.29E-10 | 5.98E-07 |
| 44237 | cellular metabolic process                                                                                  | 229 | 4990 | 579 | 17779 | 9.15E-10 | 6.00E-07 |
| 48037 | cofactor binding                                                                                            | 29  | 253  | 579 | 17779 | 4.23E-09 | 2.31E-06 |
| 3824  | catalytic activity                                                                                          | 227 | 5093 | 579 | 17779 | 1.80E-08 | 8.44E-06 |
| 9058  | biosynthetic process                                                                                        | 100 | 1797 | 579 | 17779 | 5.41E-08 | 2.22E-05 |
| 42180 | cellular ketone metabolic process                                                                           | 44  | 577  | 579 | 17779 | 1.57E-07 | 5.72E-05 |
| 44238 | primary metabolic process                                                                                   | 229 | 5288 | 579 | 17779 | 1.92E-07 | 5.72E-05 |
| 43436 | oxoacid metabolic process                                                                                   | 43  | 563  | 579 | 17779 | 2.09E-07 | 5.72E-05 |
| 19752 | carboxylic acid metabolic process                                                                           | 43  | 563  | 579 | 17779 | 2.09E-07 | 5.72E-05 |
| 6082  | organic acid metabolic process                                                                              | 43  | 570  | 579 | 17779 | 2.94E-07 | 7.41E-05 |
|       | <b>Top 10 significant pathways enriched in 662 qualified transcripts up-regulated by G1 over-expression</b> |     |      |     |       |          |          |
| 31323 | regulation of cellular metabolic process                                                                    | 253 | 3731 | 563 | 17771 | 1.99E-38 | 6.58E-35 |
| 10556 | regulation of macromolecule biosynthetic process                                                            | 216 | 2872 | 563 | 17771 | 3.13E-38 | 6.58E-35 |
| 5634  | nucleus                                                                                                     | 307 | 5180 | 563 | 17771 | 1.81E-37 | 2.54E-34 |
| 19222 | regulation of metabolic process                                                                             | 258 | 3914 | 563 | 17771 | 3.31E-37 | 3.48E-34 |
| 10468 | regulation of gene expression                                                                               | 216 | 2923 | 563 | 17771 | 4.92E-37 | 4.02E-34 |
| 9889  | regulation of biosynthetic process                                                                          | 221 | 3040 | 563 | 17771 | 5.73E-37 | 4.02E-34 |
| 60255 | regulation of macromolecule metabolic process                                                               | 235 | 3372 | 563 | 17771 | 7.44E-37 | 4.34E-34 |
| 30528 | transcription regulator activity                                                                            | 147 | 1506 | 563 | 17771 | 8.26E-37 | 4.34E-34 |
| 31326 | regulation of cellular biosynthetic process                                                                 | 218 | 3016 | 563 | 17771 | 5.88E-36 | 2.75E-33 |
| 45449 | regulation of transcription                                                                                 | 198 | 2618 | 563 | 17771 | 9.57E-35 | 4.03E-32 |

Note: x, number of gene IDs identified in the designated pathway among input gene IDs; X, number of input gene IDs selected by BiNGO; n, number of known gene IDs in the designated pathway; N, number of background gene IDs selected from the GO pool by BiNGO. Replicated pathways in the subsequent pattern-based analyses are shown in red.

Supplemental Table 5. Top pathways revealed from most differentially expressed genes by Dox-induced *APOL1* in the HEK293 G2 Tet-on cell line using Cytoscape BiNGO

| GO-ID | Description                                                                                                    | x    | n     | X    | N     | p-value  | FDR p-value |
|-------|----------------------------------------------------------------------------------------------------------------|------|-------|------|-------|----------|-------------|
|       | <b>Top 20 significant pathways enriched in 2409 qualified transcripts</b>                                      |      |       |      |       |          |             |
| 43227 | membrane-bounded organelle                                                                                     | 1240 | 8327  | 2022 | 17725 | 3.64E-43 | 2.45E-39    |
| 43231 | intracellular membrane-bounded organelle                                                                       | 1238 | 8320  | 2022 | 17725 | 8.05E-43 | 2.71E-39    |
| 44424 | intracellular part                                                                                             | 1495 | 10915 | 2022 | 17725 | 1.26E-35 | 2.84E-32    |
| 5622  | intracellular                                                                                                  | 1529 | 11268 | 2022 | 17725 | 7.46E-35 | 1.26E-31    |
| 5634  | nucleus                                                                                                        | 826  | 5170  | 2022 | 17725 | 4.44E-33 | 5.98E-30    |
| 43229 | intracellular organelle                                                                                        | 1295 | 9289  | 2022 | 17725 | 2.21E-29 | 2.48E-26    |
| 43226 | organelle                                                                                                      | 1296 | 9303  | 2022 | 17725 | 2.99E-29 | 2.88E-26    |
| 44237 | cellular metabolic process                                                                                     | 775  | 4985  | 2022 | 17725 | 2.93E-26 | 2.47E-23    |
| 44260 | cellular macromolecule metabolic process                                                                       | 577  | 3509  | 2022 | 17725 | 5.16E-24 | 3.86E-21    |
| 34641 | cellular nitrogen compound metabolic process                                                                   | 381  | 2081  | 2022 | 17725 | 2.56E-23 | 1.72E-20    |
| 8152  | metabolic process                                                                                              | 873  | 5947  | 2022 | 17725 | 6.38E-22 | 3.90E-19    |
| 6807  | nitrogen compound metabolic process                                                                            | 390  | 2199  | 2022 | 17725 | 2.92E-21 | 1.64E-18    |
| 90304 | nucleic acid metabolic process                                                                                 | 285  | 1464  | 2022 | 17725 | 3.61E-21 | 1.87E-18    |
| 6139  | nucleobase, nucleoside, nucleotide and nucleic acid metabolic process                                          | 329  | 1790  | 2022 | 17725 | 2.89E-20 | 1.39E-17    |
| 70013 | intracellular organelle lumen                                                                                  | 307  | 1642  | 2022 | 17725 | 5.08E-20 | 2.28E-17    |
| 31974 | membrane-enclosed lumen                                                                                        | 317  | 1713  | 2022 | 17725 | 5.65E-20 | 2.38E-17    |
| 43233 | organelle lumen                                                                                                | 310  | 1677  | 2022 | 17725 | 1.89E-19 | 7.50E-17    |
| 5737  | cytoplasm                                                                                                      | 1056 | 7636  | 2022 | 17725 | 1.01E-18 | 3.77E-16    |
| 44238 | primary metabolic process                                                                                      | 775  | 5280  | 2022 | 17725 | 1.41E-18 | 4.99E-16    |
| 3676  | nucleic acid binding                                                                                           | 513  | 3247  | 2022 | 17725 | 2.96E-17 | 9.97E-15    |
|       | <b>Top 10 significant pathways enriched in 1414 qualified transcripts down-regulated by G2 over-expression</b> |      |       |      |       |          |             |
| 5739  | mitochondrion                                                                                                  | 168  | 1270  | 1169 | 17765 | 4.03E-19 | 1.88E-15    |
| 48037 | cofactor binding                                                                                               | 58   | 253   | 1169 | 17765 | 2.48E-17 | 5.76E-14    |
| 44444 | cytoplasmic part                                                                                               | 457  | 5139  | 1169 | 17765 | 7.21E-15 | 1.05E-11    |

|       |                                                                                                             |     |      |      |       |          |          |
|-------|-------------------------------------------------------------------------------------------------------------|-----|------|------|-------|----------|----------|
| 8152  | metabolic process                                                                                           | 514 | 5952 | 1169 | 17765 | 9.02E-15 | 1.05E-11 |
| 55114 | oxidation reduction                                                                                         | 96  | 647  | 1169 | 17765 | 3.28E-14 | 3.05E-11 |
| 50662 | coenzyme binding                                                                                            | 43  | 181  | 1169 | 17765 | 9.13E-14 | 7.08E-11 |
| 44237 | cellular metabolic process                                                                                  | 440 | 4987 | 1169 | 17765 | 1.42E-13 | 9.42E-11 |
| 34641 | cellular nitrogen compound metabolic process                                                                | 218 | 2079 | 1169 | 17765 | 5.25E-13 | 3.05E-10 |
| 43231 | intracellular membrane-bounded organelle                                                                    | 666 | 8336 | 1169 | 17765 | 6.84E-13 | 3.54E-10 |
| 43227 | membrane-bounded organelle                                                                                  | 666 | 8343 | 1169 | 17765 | 8.37E-13 | 3.89E-10 |
|       | <b>Top 10 significant pathways enriched in 995 qualified transcripts up-regulated by G2 over-expression</b> |     |      |      |       |          |          |
| 5634  | nucleus                                                                                                     | 480 | 5169 | 860  | 17741 | 5.54E-63 | 2.77E-59 |
| 31323 | regulation of cellular metabolic process                                                                    | 362 | 3729 | 860  | 17741 | 1.03E-46 | 2.57E-43 |
| 19222 | regulation of metabolic process                                                                             | 371 | 3910 | 860  | 17741 | 9.14E-46 | 1.52E-42 |
| 10468 | regulation of gene expression                                                                               | 302 | 2919 | 860  | 17741 | 1.09E-42 | 1.36E-39 |
| 10556 | regulation of macromolecule biosynthetic process                                                            | 298 | 2869 | 860  | 17741 | 2.37E-42 | 2.10E-39 |
| 60255 | regulation of macromolecule metabolic process                                                               | 330 | 3368 | 860  | 17741 | 2.52E-42 | 2.10E-39 |
| 9889  | regulation of biosynthetic process                                                                          | 304 | 3036 | 860  | 17741 | 4.18E-40 | 2.99E-37 |
| 80090 | regulation of primary metabolic process                                                                     | 335 | 3546 | 860  | 17741 | 1.27E-39 | 7.93E-37 |
| 31326 | regulation of cellular biosynthetic process                                                                 | 301 | 3013 | 860  | 17741 | 2.04E-39 | 1.13E-36 |
| 30528 | transcription regulator activity                                                                            | 195 | 1505 | 860  | 17741 | 3.58E-39 | 1.79E-36 |

Note: x, number of gene IDs identified in the designated pathway among input gene IDs; X, number of input gene IDs selected by BiNGO; n, number of known gene IDs in the designated pathway; N, number of background gene IDs selected from the GO pool by BiNGO. Replicated pathways in the subsequent pattern-based analyses are shown in red.



Supplemental Table 6. Top pathways detected from the most differentially expressed genes with Dox-induced *APOL1* G1 vs. G0 (HEK293 Tet-on cell lines based on human Illumina HT-12 v4 arrays using Cytoscape BiNGO)

| GO-ID | Description                                                                  | x  | n    | X   | N     | p-value  | FDR p-value |
|-------|------------------------------------------------------------------------------|----|------|-----|-------|----------|-------------|
|       | <b>Top pathway enriched in 293 qualified transcripts</b>                     |    |      |     |       |          |             |
| 6259  | DNA metabolic process                                                        | 19 | 516  | 211 | 17787 | 1.32E-05 | 2.07E-02    |
|       | <b>Top pathway enriched in 70 qualified transcripts down-regulated by G1</b> |    |      |     |       |          |             |
| 5739  | mitochondrion                                                                | 14 | 1271 | 61  | 17788 | 7.87E-05 | 4.43E-02    |
|       | <b>Pathway enriched in 223 qualified transcripts up-regulated by G1</b>      |    |      |     |       |          |             |
|       | None                                                                         |    |      |     |       |          |             |

Note: x, number of gene IDs identified in the designated pathway among input gene IDs; X, number of input gene IDs selected by BiNGO; n, number of known gene IDs in the designated pathway; N, number of background gene IDs selected from the GO pool by BiNGO. Replicated pathways in the subsequent Ingenuity pathway analysis are shown in red. Since no pathway reached the nominal significance for FDR  $p < 0.01$ , only the top one with FDR  $p < 0.05$  is presented. Replicated pathway(s) in the subsequent pattern-based analyses are shown in red.

Supplemental Table 7. Top pathways detected from the most differentially expressed genes with Dox-induced *APOL1* G2 vs. G0 (HEK293 Tet-on cell lines based on human Illumina HT-12 v4 arrays using Cytoscape BiNGO)

| GO-ID | Description                                                                                 | x   | n     | X   | N     | p-value  | FDR p-value |
|-------|---------------------------------------------------------------------------------------------|-----|-------|-----|-------|----------|-------------|
|       | <b>Significant pathways enriched in 609 qualified transcripts</b>                           |     |       |     |       |          |             |
| 43231 | intracellular membrane-bounded organelle                                                    | 298 | 8346  | 490 | 17771 | 3.03E-10 | 6.20E-07    |
| 43227 | membrane-bounded organelle                                                                  | 298 | 8353  | 490 | 17771 | 3.39E-10 | 6.20E-07    |
| 5739  | mitochondrion                                                                               | 70  | 1273  | 490 | 17771 | 2.07E-08 | 2.52E-05    |
| 43229 | intracellular organelle                                                                     | 315 | 9318  | 490 | 17771 | 5.06E-08 | 4.50E-05    |
| 43226 | organelle                                                                                   | 315 | 9332  | 490 | 17771 | 6.14E-08 | 4.50E-05    |
| 44424 | intracellular part                                                                          | 355 | 10946 | 490 | 17771 | 2.00E-07 | 1.22E-04    |
| 34641 | cellular nitrogen compound metabolic process                                                | 95  | 2078  | 490 | 17771 | 3.94E-07 | 2.07E-04    |
| 5634  | nucleus                                                                                     | 192 | 5184  | 490 | 17771 | 9.24E-07 | 3.85E-04    |
| 5622  | intracellular                                                                               | 361 | 11300 | 490 | 17771 | 9.45E-07 | 3.85E-04    |
| 6807  | nitrogen compound metabolic process                                                         | 97  | 2196  | 490 | 17771 | 1.38E-06 | 5.05E-04    |
| 6139  | nucleobase, nucleoside, nucleotide and nucleic acid metabolic process                       | 80  | 1786  | 490 | 17771 | 8.48E-06 | 2.70E-03    |
| 33554 | cellular response to stress                                                                 | 37  | 618   | 490 | 17771 | 8.83E-06 | 2.70E-03    |
| 5654  | nucleoplasm                                                                                 | 48  | 931   | 490 | 17771 | 2.29E-05 | 6.29E-03    |
| 90304 | nucleic acid metabolic process                                                              | 67  | 1460  | 490 | 17771 | 2.40E-05 | 6.29E-03    |
|       | <b>Significant pathways enriched in 305 qualified transcripts down-regulated by G2</b>      |     |       |     |       |          |             |
| 5739  | mitochondrion                                                                               | 59  | 1272  | 267 | 17786 | 3.59E-15 | 9.14E-12    |
| 5737  | cytoplasm                                                                                   | 157 | 7648  | 267 | 17786 | 1.23E-07 | 1.16E-04    |
| 44444 | cytoplasmic part                                                                            | 117 | 5148  | 267 | 17786 | 1.37E-07 | 1.16E-04    |
| 44429 | mitochondrial part                                                                          | 26  | 611   | 267 | 17786 | 1.87E-06 | 1.19E-03    |
| 46483 | heterocycle metabolic process                                                               | 17  | 337   | 267 | 17786 | 1.44E-05 | 7.04E-03    |
| 44281 | small molecule metabolic process                                                            | 41  | 1370  | 267 | 17786 | 1.66E-05 | 7.04E-03    |
|       | <b>Top 10 significant pathways enriched in 304 qualified transcripts up-regulated by G2</b> |     |       |     |       |          |             |
| 5634  | nucleus                                                                                     | 114 | 5185  | 223 | 17775 | 3.78E-12 | 9.31E-09    |
| 5488  | binding                                                                                     | 192 | 12356 | 223 | 17775 | 5.37E-09 | 6.61E-06    |

|       |                                               |     |      |     |       |          |          |
|-------|-----------------------------------------------|-----|------|-----|-------|----------|----------|
| 50789 | regulation of biological process              | 122 | 6550 | 223 | 17775 | 3.66E-08 | 2.40E-05 |
| 5515  | protein binding                               | 142 | 8115 | 223 | 17775 | 3.90E-08 | 2.40E-05 |
| 50794 | regulation of cellular process                | 117 | 6220 | 223 | 17775 | 5.71E-08 | 2.52E-05 |
| 3676  | nucleic acid binding                          | 74  | 3251 | 223 | 17775 | 6.15E-08 | 2.52E-05 |
| 44451 | nucleoplasm part                              | 25  | 585  | 223 | 17775 | 9.47E-08 | 3.33E-05 |
| 10468 | regulation of gene expression                 | 68  | 2926 | 223 | 17775 | 1.25E-07 | 3.60E-05 |
| 60255 | regulation of macromolecule metabolic process | 75  | 3375 | 223 | 17775 | 1.32E-07 | 3.60E-05 |
| 3677  | DNA binding                                   | 58  | 2328 | 223 | 17775 | 1.49E-07 | 3.66E-05 |

Note: x, number of gene IDs identified in the designated pathway among input gene IDs; X, number of input gene IDs selected by BiNGO; n, number of known gene IDs in the designated pathway; N, number of background gene IDs selected from the GO pool by BiNGO. Replicated pathways in the subsequent pattern-based analyses are shown in red.



|          |     |       |                                               |     |      |     |       |          |          |
|----------|-----|-------|-----------------------------------------------|-----|------|-----|-------|----------|----------|
| 9        | 410 | 5634  | nucleus                                       | 143 | 5181 | 317 | 17767 | 9.40E-10 | 2.19E-06 |
|          |     | 44451 | nucleoplasm part                              | 34  | 585  | 317 | 17767 | 1.49E-09 | 2.19E-06 |
|          |     | 5515  | protein binding                               | 195 | 8110 | 317 | 17767 | 7.50E-09 | 5.48E-06 |
|          |     | 50794 | regulation of cellular process                | 160 | 6212 | 317 | 17767 | 7.92E-09 | 5.48E-06 |
|          |     | 50789 | regulation of biological process              | 166 | 6542 | 317 | 17767 | 9.33E-09 | 5.48E-06 |
|          |     | 90304 | nucleic acid metabolic process                | 57  | 1460 | 317 | 17767 | 1.39E-08 | 6.79E-06 |
|          |     | 44260 | cellular macromolecule metabolic process      | 104 | 3507 | 317 | 17767 | 2.14E-08 | 8.96E-06 |
|          |     | 60255 | regulation of macromolecule metabolic process | 100 | 3372 | 317 | 17767 | 4.66E-08 | 1.71E-05 |
|          |     | 16604 | nuclear body                                  | 17  | 191  | 317 | 17767 | 6.03E-08 | 1.97E-05 |
|          |     | 19222 | regulation of metabolic process               | 110 | 3914 | 317 | 17767 | 1.29E-07 | 3.40E-05 |
| 10       | 31  |       |                                               |     |      |     |       |          |          |
| 11       | 54  |       |                                               |     |      |     |       |          |          |
| 12       | 18  |       |                                               |     |      |     |       |          |          |
| 13       | 71  |       |                                               |     |      |     |       |          |          |
| 14       | 7   |       |                                               |     |      |     |       |          |          |
| 5&9      | 564 | 5634  | nucleus                                       | 215 | 5180 | 443 | 17761 | 2.83E-18 | 1.01E-14 |
|          |     | 50794 | regulation of cellular process                | 239 | 6210 | 443 | 17761 | 1.04E-16 | 1.85E-13 |
|          |     | 50789 | regulation of biological process              | 246 | 6540 | 443 | 17761 | 4.26E-16 | 5.08E-13 |
|          |     | 60255 | regulation of macromolecule metabolic process | 152 | 3370 | 443 | 17761 | 7.76E-15 | 6.94E-12 |
|          |     | 31323 | regulation of cellular metabolic process      | 161 | 3729 | 443 | 17761 | 3.97E-14 | 2.84E-11 |
|          |     | 19222 | regulation of metabolic process               | 166 | 3912 | 443 | 17761 | 5.88E-14 | 3.51E-11 |
|          |     | 5515  | protein binding                               | 279 | 8107 | 443 | 17761 | 8.57E-14 | 3.69E-11 |
|          |     | 10468 | regulation of gene expression                 | 135 | 2922 | 443 | 17761 | 8.87E-14 | 3.69E-11 |
|          |     | 65007 | biological regulation                         | 249 | 6927 | 443 | 17761 | 9.30E-14 | 3.69E-11 |
|          |     | 44451 | nucleoplasm part                              | 48  | 585  | 443 | 17761 | 3.87E-13 | 1.39E-10 |
| 7&13     | 223 | 5739  | mitochondrion                                 | 34  | 1272 | 191 | 17785 | 6.66E-07 | 1.34E-03 |
| 6,7 & 13 | 601 | 5739  | mitochondrion                                 | 121 | 1273 | 533 | 17774 | 3.82E-31 | 1.33E-27 |
|          |     | 44444 | cytoplasmic part                              | 248 | 5147 | 533 | 17774 | 2.30E-18 | 4.01E-15 |
|          |     | 44429 | mitochondrial part                            | 62  | 612  | 533 | 17774 | 3.06E-17 | 3.55E-14 |
|          |     | 43231 | intracellular membrane-bounded organelle      | 340 | 8341 | 533 | 17774 | 1.44E-15 | 1.17E-12 |

|  |  |       |                            |     |       |     |       |          |          |
|--|--|-------|----------------------------|-----|-------|-----|-------|----------|----------|
|  |  | 43227 | membrane-bounded organelle | 340 | 8348  | 533 | 17774 | 1.67E-15 | 1.17E-12 |
|  |  | 5737  | cytoplasm                  | 318 | 7643  | 533 | 17774 | 3.17E-15 | 1.84E-12 |
|  |  | 44237 | cellular metabolic process | 224 | 4986  | 533 | 17774 | 1.51E-12 | 7.54E-10 |
|  |  | 43229 | intracellular organelle    | 356 | 9316  | 533 | 17774 | 6.00E-12 | 2.62E-09 |
|  |  | 43226 | organelle                  | 356 | 9330  | 533 | 17774 | 7.72E-12 | 2.93E-09 |
|  |  | 44424 | intracellular part         | 401 | 10944 | 533 | 17774 | 8.39E-12 | 2.93E-09 |

Note: x, number of gene IDs identified in the designated pathway among input gene IDs; X, number of input gene IDs selected by BiNGO; n, number of known gene IDs in the designated pathway; N, number of background gene IDs selected from the GO pool by BiNGO. FDR p value of 0.01 is defined as minimum significance for each listed pattern. For multiple significant pathways, only the top ten are included for each pattern.

Pathways significant in paired and pattern-based analyses are shown in red.

Supplemental Table 9. Pathways detected in pattern-based analysis AFFY using Cytoscape-based BiNGO for 3620 qualified genes

| Pattern | Number of genes | GO-ID | Description                                  | x    | n     | X    | N     | p-value  | corr p-value |
|---------|-----------------|-------|----------------------------------------------|------|-------|------|-------|----------|--------------|
| 1       | 222             | 44085 | cellular component biogenesis                | 24   | 1035  | 116  | 17786 | 4.47E-08 | 3.10E-05     |
|         |                 | 51276 | chromosome organization                      | 17   | 525   | 116  | 17786 | 5.20E-08 | 3.10E-05     |
|         |                 | 6334  | nucleosome assembly                          | 8    | 83    | 116  | 17786 | 6.73E-08 | 3.10E-05     |
|         |                 | 5634  | nucleus                                      | 61   | 5185  | 116  | 17786 | 9.62E-08 | 3.10E-05     |
|         |                 | 31497 | chromatin assembly                           | 8    | 87    | 116  | 17786 | 9.76E-08 | 3.10E-05     |
|         |                 | 6333  | chromatin assembly or disassembly            | 9    | 127   | 116  | 17786 | 1.45E-07 | 3.10E-05     |
|         |                 | 44428 | nuclear part                                 | 31   | 1741  | 116  | 17786 | 1.47E-07 | 3.10E-05     |
|         |                 | 65004 | protein-DNA complex assembly                 | 8    | 92    | 116  | 17786 | 1.51E-07 | 3.10E-05     |
|         |                 | 34728 | nucleosome organization                      | 8    | 93    | 116  | 17786 | 1.65E-07 | 3.10E-05     |
|         |                 | 44260 | cellular macromolecule metabolic process     | 47   | 3507  | 116  | 17786 | 2.00E-07 | 3.23E-05     |
|         |                 |       |                                              |      |       |      |       |          |              |
| 2       | 1674            | 5739  | mitochondrion                                | 274  | 1272  | 1357 | 17736 | 9.68E-61 | 5.19E-57     |
|         |                 | 43231 | intracellular membrane-bounded organelle     | 899  | 8330  | 1357 | 17736 | 3.57E-50 | 9.58E-47     |
|         |                 | 43227 | membrane-bounded organelle                   | 899  | 8337  | 1357 | 17736 | 5.61E-50 | 1.00E-46     |
|         |                 | 44424 | intracellular part                           | 1076 | 10922 | 1357 | 17736 | 5.39E-48 | 7.23E-45     |
|         |                 | 5622  | intracellular                                | 1091 | 11275 | 1357 | 17736 | 1.07E-44 | 1.15E-41     |
|         |                 | 8152  | metabolic process                            | 687  | 5931  | 1357 | 17736 | 3.45E-42 | 3.08E-39     |
|         |                 | 44237 | cellular metabolic process                   | 605  | 4971  | 1357 | 17736 | 4.81E-42 | 3.69E-39     |
|         |                 | 34641 | cellular nitrogen compound metabolic process | 329  | 2071  | 1357 | 17736 | 8.65E-42 | 5.80E-39     |
|         |                 | 44444 | cytoplasmic part                             | 613  | 5133  | 1357 | 17736 | 5.40E-40 | 3.22E-37     |
|         |                 | 6807  | nitrogen compound metabolic process          | 337  | 2189  | 1357 | 17736 | 6.39E-40 | 3.43E-37     |
|         |                 |       |                                              |      |       |      |       |          |              |
| 3       | 238             | 32502 | developmental process                        | 67   | 3234  | 185  | 17780 | 4.15E-09 | 1.11E-05     |
|         |                 | 7275  | multicellular organismal development         | 62   | 2971  | 185  | 17780 | 1.65E-08 | 2.20E-05     |
|         |                 | 48856 | anatomical structure development             | 56   | 2656  | 185  | 17780 | 7.96E-08 | 5.94E-05     |
|         |                 | 35295 | tube development                             | 16   | 297   | 185  | 17780 | 8.98E-08 | 5.94E-05     |

|   |      |       |                                                  |     |      |      |       |          |          |
|---|------|-------|--------------------------------------------------|-----|------|------|-------|----------|----------|
|   |      | 9653  | anatomical structure morphogenesis               | 34  | 1218 | 185  | 17780 | 1.11E-07 | 5.94E-05 |
|   |      | 48731 | system development                               | 50  | 2422 | 185  | 17780 | 9.86E-07 | 4.39E-04 |
|   |      | 50794 | regulation of cellular process                   | 96  | 6219 | 185  | 17780 | 1.59E-06 | 6.07E-04 |
|   |      | 1657  | ureteric bud development                         | 7   | 60   | 185  | 17780 | 2.86E-06 | 9.54E-04 |
|   |      | 50789 | regulation of biological process                 | 98  | 6549 | 185  | 17780 | 5.08E-06 | 1.51E-03 |
|   |      | 65007 | biological regulation                            | 102 | 6938 | 185  | 17780 | 5.99E-06 | 1.60E-03 |
|   |      |       |                                                  |     |      |      |       |          |          |
| 4 | 1206 | 5634  | nucleus                                          | 543 | 5167 | 1020 | 17727 | 6.00E-62 | 3.06E-58 |
|   |      | 10468 | regulation of gene expression                    | 364 | 2920 | 1020 | 17727 | 1.49E-53 | 3.79E-50 |
|   |      | 60255 | regulation of macromolecule metabolic process    | 398 | 3369 | 1020 | 17727 | 2.30E-53 | 3.92E-50 |
|   |      | 50794 | regulation of cellular process                   | 588 | 6202 | 1020 | 17727 | 2.68E-52 | 3.41E-49 |
|   |      | 10556 | regulation of macromolecule biosynthetic process | 357 | 2868 | 1020 | 17727 | 3.95E-52 | 4.03E-49 |
|   |      | 19222 | regulation of metabolic process                  | 433 | 3910 | 1020 | 17727 | 3.22E-51 | 2.73E-48 |
|   |      | 31323 | regulation of cellular metabolic process         | 419 | 3727 | 1020 | 17727 | 7.38E-51 | 5.37E-48 |
|   |      | 50789 | regulation of biological process                 | 603 | 6532 | 1020 | 17727 | 4.82E-50 | 3.07E-47 |
|   |      | 9889  | regulation of biosynthetic process               | 365 | 3035 | 1020 | 17727 | 9.04E-50 | 5.12E-47 |
|   |      | 31326 | regulation of cellular biosynthetic process      | 362 | 3012 | 1020 | 17727 | 3.41E-49 | 1.74E-46 |
|   |      |       |                                                  |     |      |      |       |          |          |
| 5 | 63   |       |                                                  |     |      |      |       |          |          |
|   |      |       |                                                  |     |      |      |       |          |          |
| 6 | 68   |       |                                                  |     |      |      |       |          |          |
|   |      |       |                                                  |     |      |      |       |          |          |
| 7 | 21   |       |                                                  |     |      |      |       |          |          |
|   |      |       |                                                  |     |      |      |       |          |          |
| 8 | 88   | 31323 | regulation of cellular metabolic process         | 35  | 3734 | 69   | 17784 | 4.33E-08 | 5.66E-05 |
|   |      | 19222 | regulation of metabolic process                  | 35  | 3917 | 69   | 17784 | 1.52E-07 | 6.70E-05 |
|   |      | 5634  | nucleus                                          | 41  | 5181 | 69   | 17784 | 1.54E-07 | 6.70E-05 |
|   |      | 10468 | regulation of gene expression                    | 29  | 2927 | 69   | 17784 | 4.26E-07 | 1.19E-04 |
|   |      | 45449 | regulation of transcription                      | 27  | 2621 | 69   | 17784 | 6.15E-07 | 1.19E-04 |



|     |      |       |                                                      |      |       |      |       |          |          |
|-----|------|-------|------------------------------------------------------|------|-------|------|-------|----------|----------|
|     |      | 80090 | regulation of primary metabolic process              | 32   | 3553  | 69   | 17784 | 6.69E-07 | 1.19E-04 |
|     |      | 60255 | regulation of macromolecule metabolic process        | 31   | 3376  | 69   | 17784 | 7.39E-07 | 1.19E-04 |
|     |      | 19219 | regulation of nucleobase, nucleoside, nucleotide and | 29   | 3013  | 69   | 17784 | 7.94E-07 | 1.19E-04 |
|     |      | 6357  | regulation of transcription from RNA polymerase II   | 14   | 747   | 69   | 17784 | 8.51E-07 | 1.19E-04 |
|     |      | 51171 | regulation of nitrogen compound metabolic process    | 29   | 3039  | 69   | 17784 | 9.54E-07 | 1.19E-04 |
|     |      |       |                                                      |      |       |      |       |          |          |
| 9   | 7    |       |                                                      |      |       |      |       |          |          |
|     |      |       |                                                      |      |       |      |       |          |          |
| 10  | 33   |       |                                                      |      |       |      |       |          |          |
|     |      |       |                                                      |      |       |      |       |          |          |
| 1&2 | 1911 | 5739  | mitochondrion                                        | 288  | 1272  | 1468 | 17733 | 3.07E-61 | 1.70E-57 |
|     |      | 43231 | intracellular membrane-bounded organelle             | 976  | 8330  | 1468 | 17733 | 9.56E-56 | 2.65E-52 |
|     |      | 43227 | membrane-bounded organelle                           | 976  | 8337  | 1468 | 17733 | 1.57E-55 | 2.90E-52 |
|     |      | 44424 | intracellular part                                   | 1164 | 10921 | 1468 | 17733 | 4.77E-52 | 6.61E-49 |
|     |      | 5622  | intracellular                                        | 1180 | 11274 | 1468 | 17733 | 2.29E-48 | 2.54E-45 |
|     |      | 8152  | metabolic process                                    | 750  | 5929  | 1468 | 17733 | 3.45E-48 | 3.19E-45 |
|     |      | 44237 | cellular metabolic process                           | 661  | 4970  | 1468 | 17733 | 5.82E-48 | 4.61E-45 |
|     |      | 34641 | cellular nitrogen compound metabolic process         | 360  | 2070  | 1468 | 17733 | 2.90E-47 | 2.01E-44 |
|     |      | 6807  | nitrogen compound metabolic process                  | 369  | 2188  | 1468 | 17733 | 2.69E-45 | 1.65E-42 |
|     |      | 43229 | intracellular organelle                              | 1020 | 9303  | 1468 | 17733 | 1.15E-43 | 6.35E-41 |
|     |      |       |                                                      |      |       |      |       |          |          |
| 3&4 | 1665 | 50794 | regulation of cellular process                       | 728  | 6201  | 1346 | 17713 | 2.90E-50 | 1.69E-46 |
|     |      | 5634  | nucleus                                              | 640  | 5167  | 1346 | 17713 | 8.47E-50 | 2.47E-46 |
|     |      | 50789 | regulation of biological process                     | 750  | 6530  | 1346 | 17713 | 1.55E-48 | 3.01E-45 |
|     |      | 10468 | regulation of gene expression                        | 426  | 2920  | 1346 | 17713 | 7.90E-47 | 1.15E-43 |
|     |      | 31323 | regulation of cellular metabolic process             | 503  | 3726  | 1346 | 17713 | 9.94E-47 | 1.16E-43 |
|     |      | 60255 | regulation of macromolecule metabolic process        | 468  | 3369  | 1346 | 17713 | 3.37E-46 | 3.28E-43 |
|     |      | 19222 | regulation of metabolic process                      | 518  | 3909  | 1346 | 17713 | 5.52E-46 | 4.61E-43 |
|     |      | 10556 | regulation of macromolecule biosynthetic process     | 418  | 2868  | 1346 | 17713 | 1.18E-45 | 8.61E-43 |

|  |  |       |                                             |     |      |      |       |          |          |
|--|--|-------|---------------------------------------------|-----|------|------|-------|----------|----------|
|  |  | 9889  | regulation of biosynthetic process          | 432 | 3035 | 1346 | 17713 | 1.10E-44 | 7.11E-42 |
|  |  | 31326 | regulation of cellular biosynthetic process | 429 | 3012 | 1346 | 17713 | 2.20E-44 | 1.28E-41 |

Note: x, number of gene IDs identified in the designated pathway among input gene IDs; X, number of input gene IDs selected by BiNGO; n, number of known gene IDs in the designated pathway; N, number of background gene IDs selected from the GO pool by BiNGO. FDR p value of 0.01 is defined as minimum significance for each listed pattern. For multiple significant pathways, only the top ten are included for each pattern.

Pathways significant in paired and pattern-based analyses are shown in red.

Supplemental Table 10. Top pathways detected in pattern-based analysis AFFY using IPA

| Pattern | Top Canonical pathways            | FDR p-value | Target molecules in dataset                                                                                                                                                                                                                                                                                                            |
|---------|-----------------------------------|-------------|----------------------------------------------------------------------------------------------------------------------------------------------------------------------------------------------------------------------------------------------------------------------------------------------------------------------------------------|
| 1&2     | tRNA Charging                     | 8.66E-23    | CARS,GARS,DARS2,NARS2,FARSB,NARS,LARS,TARS2,FARS2,KARS,DARS,EARS2,VARS,SARS,SARS2,IARS,IARS2,RARS2,CARS2,MARS,FARSA,EPRS,WARS,RARS,YARS,AARS2,AARS                                                                                                                                                                                     |
|         | Mitochondrial Dysfunction         | 2.49E-08    | SDHB,ATP5H,NDUFA9,PSENE,NDUFA7,COX6A1,COX8A,NDUFB5,ACO2,DHODH,NDUFB10,NDUFS1,SOD2,PARK7,ATPAF1,NDUFS2,CASP8,ATP5F1,NDUFAF1,UCP2,ATP5O,NDUFV3,SDHC,VDAC3,ATP5C1,COX11,NDUFV2,TXN2,UQCR10,CYC1,CAT,NDUFA12,CYB5A,COX15                                                                                                                   |
|         | Valine Degradation I              | 7.04E-08    | BCAT1,ECHS1,BCAT2,HIBADH,DLD,DBT,ACADSB,EHHADH,ALDH6A1,BCKDHB                                                                                                                                                                                                                                                                          |
|         | Isoleucine Degradation I          | 1.15E-06    | BCAT1,ACAT2,ECHS1,BCAT2,DLD,ACAT1,ACADSB,EHHADH                                                                                                                                                                                                                                                                                        |
|         | Oxidative Phosphorylation         | 1.50E-06    | SDHB,ATP5H,NDUFA9,NDUFA7,COX6A1,ATP5O,NDUFV3,NDUFB5,COX8A,SDHC,NDUFB10,ATP5C1,NDUFS1,COX11,NDUFV2,UQCR10,CYC1,ATPAF1,NDUFA12,NDUFS2,CYB5A,ATP5F1,COX15                                                                                                                                                                                 |
| 3 & 4   | Molecular Mechanisms of Cancer    | 2.38E-11    | RAF1,AXIN1,PIK3R1,SMAD3,TAB2,GSK3A,CCND1,RHOB,GNA13,NFKBIB,HIPK2,BIRC3,CDC25A,E2F4,CASP3,CREBBP,GNAZ,TCF3,RASGRF2,ADCY9,DAXX,CBL,GAB1,RND3,MAP2K3,NOTCH1,RAP1B,PIK3CA,BMP2,LRP6,GNA11,BMPR2,E2F3,NFKB1,BCL2,EP300,BRAF,JUN,NFKBIA,TGFB2,SMAD4,RHOF,MAP2K1,ITGB1,ARHGEF12,GNAQ,SMAD7,ADCY6,SIN3A,FZD8,FOS,PAK2,CDKN1A,RBPJ,BCL2L11,FZD7 |
|         | TGF-β Signaling                   | 5.30E-10    | RAF1,BMP2,SMAD3,CREBBP,SKI,SMAD7,BMPR2,ACVR2B,HOXC9,INHBB,EP300,SMURF1,BCL2,FOS,JUN,PIAS4,RNF111,TGFB2,SMAD4,SMURF2,MAP2K3,TFE3,MAP2K1                                                                                                                                                                                                 |
|         | ERK5 Signaling                    | 1.48E-09    | IL6ST,RPS6KB1,YWHAH,SGK1,CREBBP,GNAQ,MEF2A,EP300,FOS,GAB1,MEF2D,FOXO3,FOSL1,RPS6KA1,GNA13,WNK1,MAP3K3,ELK4,MAP3K2                                                                                                                                                                                                                      |
|         | Glucocorticoid Receptor Signaling | 2.76E-09    | PBRM1,RAF1,PIK3CA,ARID1A,YWHAH,HSPA14,SGK1,NFATC3,SMAD3,PIK3R1,ARID2,NFKB1,EP300,BCL2,NFKBIA,NFAT5,JUN,CCL2,BAG1,PPP3R1,FOXO3,TGFB2,PRKAA2,SMAD4,TAF3,NFKBIB,MAP2K1,CXCL8,CREBBP,MAP3K1,HSPA2,NCOA3,HSPA8,TAF4B,FOS,POU2F1,TAF5,DUSP1,CDKN1A,FKBP4,NCOA1,SMARCC1,PHF10                                                                 |
|         | PTEN Signaling                    | 2.92E-09    | FOXO4,RAF1,PIK3CA,YWHAH,PIK3R1,TGFBR3,BMPR2,PDPK1,GSK3A,NFKB1,CCND1,BCL2,FOXO3,IGF1R,MAP2K1,ITGB1,RPS6KB1,CASP3,FGFR1,FOXG1,CNKSR3,CSNK2A2,CBL,CDKN1A,INSR,BCL2L11                                                                                                                                                                     |

Pathways significant in paired and pattern-based analyses are shown in red.

Supplemental Table 11. Most differentially expressed transcripts in primary tubular cells with two *APOL1* risk variants vs. homozygous G0

| Gene Symbol                                                             | Description                                                                                                                                                                               | Gene Fold Change | p-value  |
|-------------------------------------------------------------------------|-------------------------------------------------------------------------------------------------------------------------------------------------------------------------------------------|------------------|----------|
| SEMA3A                                                                  | sema domain, immunoglobulin domain (Ig), short basic domain, secreted, (semaphorin) 3A                                                                                                    | -2.45            | 0.001082 |
| PREX2                                                                   | phosphatidylinositol-3,4,5-trisphosphate-dependent Rac exchange factor 2                                                                                                                  | -2.15            | 0.001715 |
| <b>NAPRT/NAPRT1</b>                                                     | nicotinate phosphoribosyltransferase; nicotinate phosphoribosyltransferase domain containing 1                                                                                            | -1.96            | 0.002019 |
| PIK3AP1                                                                 | phosphoinositide-3-kinase adaptor protein 1                                                                                                                                               | -1.9             | 0.004585 |
| RAB19                                                                   | RAB19, member RAS oncogene family                                                                                                                                                         | -1.89            | 0.000689 |
| ATP5J                                                                   | ATP synthase, H <sup>+</sup> transporting, mitochondrial Fo complex, subunit F6; ATP synthase, H <sup>+</sup> transporting, mitochondrial FO complex, subunit F6                          | -1.88            | 0.000917 |
| TRIM55                                                                  | tripartite motif containing 55; tripartite motif-containing 55                                                                                                                            | -1.81            | 0.002754 |
| FLOT1                                                                   | flotillin 1                                                                                                                                                                               | -1.74            | 0.000397 |
| SEC14L1<br>SCARNA16<br>SNHG20<br>MIR6516<br>LINC00338                   | SEC14-like 1 ( <i>S. cerevisiae</i> ); small Cajal body-specific RNA 16; small nucleolar RNA host gene 20 (non-protein coding); microRNA 6516; long intergenic non-protein coding RNA 338 | -1.71            | 0.000408 |
| LOC100133331<br>LINC01001<br>LOC101929819<br>LOC388572<br>RP11-206L10.3 | uncharacterized LOC100133331; long intergenic non-protein coding RNA 1001; putative uncharacterized protein encoded by LINC00174-like; uncharacterized LOC388572; novel transcript        | -1.71            | 0.001442 |
| HLA-H HLA-A                                                             | major histocompatibility complex, class I, H (pseudogene); major histocompatibility complex, class I, A                                                                                   | -1.68            | 0.002199 |
| SLC44A4                                                                 | solute carrier family 44, member 4                                                                                                                                                        | -1.67            | 0.001366 |
| HLA-DQB1<br>XXbac-BPG254F23.6                                           | major histocompatibility complex, class II, DQ beta 1; putative novel transcript                                                                                                          | -1.62            | 0.001076 |
| VARS                                                                    | valyl-tRNA synthetase                                                                                                                                                                     | -1.56            | 0.001477 |
| BCAR3                                                                   | breast cancer anti-estrogen resistance 3                                                                                                                                                  | -1.52            | 0.001427 |
| UBALD2                                                                  | UBA-like domain containing 2                                                                                                                                                              | -1.51            | 0.004272 |
| HM13<br>MCTS2P                                                          | histocompatibility (minor) 13; malignant T cell amplified sequence 2, pseudogene                                                                                                          | -1.5             | 0.004255 |
| DNM1                                                                    | dynamamin 1                                                                                                                                                                               | 1.5              | 0.002191 |
| ABHD13                                                                  | abhydrolase domain containing 13                                                                                                                                                          | 1.52             | 0.000011 |
| ACN9                                                                    | ACN9 homolog ( <i>S. cerevisiae</i> )                                                                                                                                                     | 1.55             | 0.00175  |
| BPNT1                                                                   | 3(2), 5-bisphosphate nucleotidase 1; 3'(2'), 5'-bisphosphate nucleotidase 1                                                                                                               | 1.55             | 0.003687 |

|                                                             |                                                                                                                                                                                                                                                |       |          |
|-------------------------------------------------------------|------------------------------------------------------------------------------------------------------------------------------------------------------------------------------------------------------------------------------------------------|-------|----------|
| PARK7                                                       | parkinson protein 7; Parkinson disease (autosomal recessive, early onset) 7                                                                                                                                                                    | 1.56  | 0.003173 |
| MEST                                                        | mesoderm specific transcript; mesoderm specific transcript homolog (mouse)                                                                                                                                                                     | 1.57  | 0.003132 |
| TMEM45A                                                     | transmembrane protein 45A                                                                                                                                                                                                                      | 1.64  | 0.000339 |
| RP13-131K19.1                                               | novel transcript                                                                                                                                                                                                                               | 1.64  | 0.002966 |
| MIR202<br>MIR202HG                                          | microRNA 202; MIR202 host gene (non-protein coding)                                                                                                                                                                                            | 1.68  | 0.000036 |
| <b>ZEB2</b>                                                 | zinc finger E-box binding homeobox 2; ZEB2 antisense RNA 1                                                                                                                                                                                     | 1.69  | 0.00312  |
| CNN2                                                        | calponin 2                                                                                                                                                                                                                                     | 1.71  | 0.000316 |
| WRB                                                         | tryptophan rich basic protein                                                                                                                                                                                                                  | 1.72  | 0.00135  |
| CHIC1                                                       | cysteine-rich hydrophobic domain 1                                                                                                                                                                                                             | 1.76  | 0.001953 |
| MEIS2                                                       | Meis homeobox 2                                                                                                                                                                                                                                | 1.78  | 0.000329 |
| FPGT-TNNI3K                                                 | FPGT-TNNI3K readthrough; fucose-1-phosphate guanylyltransferase; TNNI3 interacting kinase                                                                                                                                                      | 1.79  | 0.004731 |
| ZNF253                                                      | zinc finger protein 253                                                                                                                                                                                                                        | 1.9   | 0.003295 |
| TIMM13                                                      | translocase of inner mitochondrial membrane 13 homolog (yeast)                                                                                                                                                                                 | 2.03  | 0.000023 |
| SLC2A9                                                      | solute carrier family 2 (facilitated glucose transporter), member 9                                                                                                                                                                            | 2.06  | 0.001265 |
| FILIP1L                                                     | filamin A interacting protein 1-like                                                                                                                                                                                                           | 2.24  | 0.001918 |
| SLIT3                                                       | slit homolog 3 (Drosophila)                                                                                                                                                                                                                    | 2.3   | 0.002095 |
| LOC101927630<br>AC017060.1                                  | uncharacterized LOC101927630; novel transcript                                                                                                                                                                                                 | 2.32  | 0.002769 |
| CTSC                                                        | cathepsin C                                                                                                                                                                                                                                    | 2.35  | 0.004052 |
| PDE1A                                                       | phosphodiesterase 1A, calmodulin-dependent                                                                                                                                                                                                     | 2.51  | 0.000152 |
| OR2A9P OR2A20P<br>OR2A1-AS1<br>LOC101928605<br>RP4-798C17.6 | olfactory receptor, family 2, subfamily A, member 9 pseudogene; olfactory receptor, family 2, subfamily A, member 20 pseudogene; OR2A1 antisense RNA 1; uncharacterized LOC101928605; novel transcript, antisense to OR2A9P, OR2A1 and ARHGEF5 | 2.69  | 0.000363 |
| FGB                                                         | fibrinogen beta chain                                                                                                                                                                                                                          | 44.95 | 0.004883 |

Note: Significant threshold is set at absolute fold change greater than 1.5 and p value less than 0.005. Gene IDs shown in red are replicated transcripts identified in HEK293 Tet-on cell pattern analysis. NAPRT/NAPRT1 falls into pattern 7 and ZEB2 into pattern 9 in Supplemental Table 8.

Supplemental Table 12. Primary antibodies used in immunoblot and immunofluorescence

| Antibody           | Vendor         | Catalog #                                   | Host species | Dilution |
|--------------------|----------------|---------------------------------------------|--------------|----------|
| Immunoblot         |                |                                             |              |          |
| APOL1              | Lampire        | Custom designed ref<br>Weckerle et al., JLR | rabbit       | 1:1,000  |
| COXIV              | Cell Signaling | 4850                                        | rabbit       | 1:1,000  |
| Porin/VDAC1        | Abcam          | ab14734                                     | mouse        | 1:1,000  |
| $\beta$ -actin     | Sigma          | A5441                                       | mouse        | 1:10,000 |
| Immunofluorescence |                |                                             |              |          |
| APOL1              | Epitomics      | 3245-1                                      | rabbit       | 1:1,000  |
| ATP5A1             | Invitrogen     | 439800                                      | mouse        | 1:1,000  |
